# Supplementary material for: Trends and Disparities in Cardiovascular Disease Burden Among Lung Cancer-Related Deaths in the United States, 1999–2020: A Nationwide Disproportionality Analysis
Source: Research Square preprint supplement (doi:10.21203/rs.3.rs-7869239/v1), 2025-11-19
Supplement: Supplementary file 1 [file bbec4f6ce7b002403d9561a6.docx]

**Supplementary Material**

**Calculations:**

**CVD Burden in Cancer Population (A/B Ratio)**: The first step involves calculating the burden of CVD within the population of cancer-related deaths. This is done by determining the ratio of deaths where both CVD and cancer are listed on the death certificate (A) to the total number of cancer-related deaths (B):

CVD Burden in Cancer Mortality = A/B = X

Here, A represents the deaths where CVD was documented alongside cancer, capturing the intersection of these two significant causes of mortality. B serves as the denominator, encompassing all cancer-related deaths, thereby contextualizing the burden of CVD within this specific population. The ratio is denoted as X for ease in future steps.

**CVD Burden in Non-Cancer Population [C-A) / (D-B) Adjustment]**: To accurately assess the CVD burden in the non-cancer population, it was critical to exclude the overlap of cancer-related deaths from the overall CVD mortality figures. Consequently, the cancer deaths were excluded from the All-Cause death numbers as well. This adjustment ensures that the calculated burden is exclusively reflective of the non-cancer cohort. The formula used is:

CVD Burden in Non-cancer patients = = Y

C represents the total number of deaths where CVD was listed as a cause, while D represents all-cause mortality. Subtracting A from C and B from D removes the influence of cancer deaths, thus providing a clearer picture of CVD burden in the non-cancer population. The ratio is denoted by Y.

**Returning Odds Ratio (ROR):** The returning odds ratio is derived by comparing the CVD burden in the cancer population to the CVD burden in the non-cancer population. This is expressed as:

ROR= CVD Burden in Cancer / CVD Burden in Non-Cancer =

The ROR effectively quantifies how the burden of CVD in cancer patients compares to that in non-cancer patients, after adjusting for the potential overlap in mortality causes. A ROR greater than 1 suggests a higher relative burden of CVD in the cancer population compared to the non-cancer population, while a ROR less than 1 indicates a lower relative burden.

**Supplementary Figures and Tables Legend**

**Supplementary Figure 1:** CVD Burden in Lung Cancer-Related Reporting Odds Ratio Stratified by Age Group in the United States, 1999-2020

**Supplementary Figure 2:** CVD Burden in Lung Cancer-Related Reporting Odds Ratio Stratified by Sex and Age Group in the United States, 1999-2020

**Supplementary Figure 3:** CVD Burden in Lung Cancer-Related Reporting Odds Ratio Stratified by Region and Age Group in the United States, 1999-2020

**Supplementary Figure 4:** CVD Burden in Lung Cancer-Related Reporting Odds Ratio Stratified by Race and Age Group in the United States, 1999-2020

**Supplementary Figure 5:** CVD Burden in Lung Cancer-Related Reporting Odds Ratio Stratified by Urbanization and Age Group in the United States, 1999-2020

**Supplementary Table 1:** Total Deaths and Returning Odds Ratio of CVD Burden in Lung Cancers in Individuals aged 15-85+ in United States from 1999-2020

**Supplementary Table 2**: Annual Trends in the cardiovascular disease (CVD) Burden Among Lung Cancer–Related and Non-Cancer Deaths with Corresponding Reporting Odds Ratios (RORs) in Individuals aged 15-85+ in United States from 1999-2020

**Supplementary Table 3:** Average Annual percent change (AAPC) of CVD Burden in Lung Cancer, related Returning Odds Ratio in the United States, 1999 to 2020

**Supplementary Table 4:** Lung Cancer-related and Lung Cancer and Heart Failure-related Mortality, Stratified by Overall, gender, and Urbanization in Adults in the United States 1999-2020

**Supplementary Table 5:** Lung Cancer-related Age-Adjusted Mortality Rates per 100,000, Stratified by Race in Adults in the United States 1999-2020

**Supplementary Table 6:** LungCancer-related Age-Adjusted Mortality Rates per 100,000, Stratified by Race in Adults in the United States 1999-2020

**Supplementary Table 7:** Total Deaths and Returning Odds Ratio of CVD Burden in Lung Cancer, stratified by Place of Death in Individuals aged 15-85+ in United States from 1999-2020


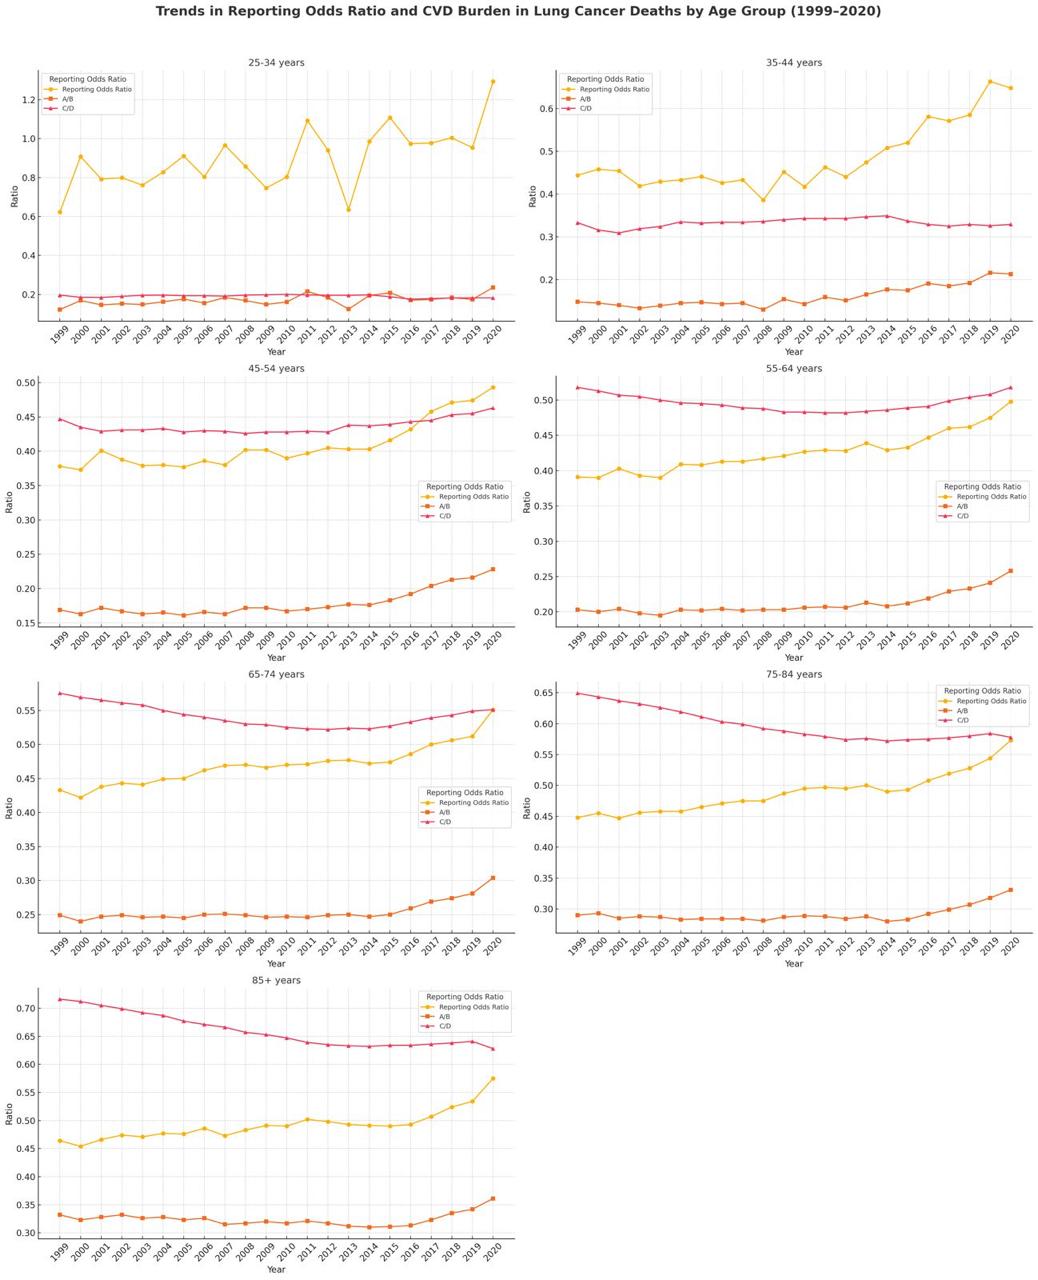


**Supplementary Figure 1:** CVD Burden in Lung Cancer-Related Reporting Odds Ratio Stratified by Age Group in the Unites States, 1999-2020


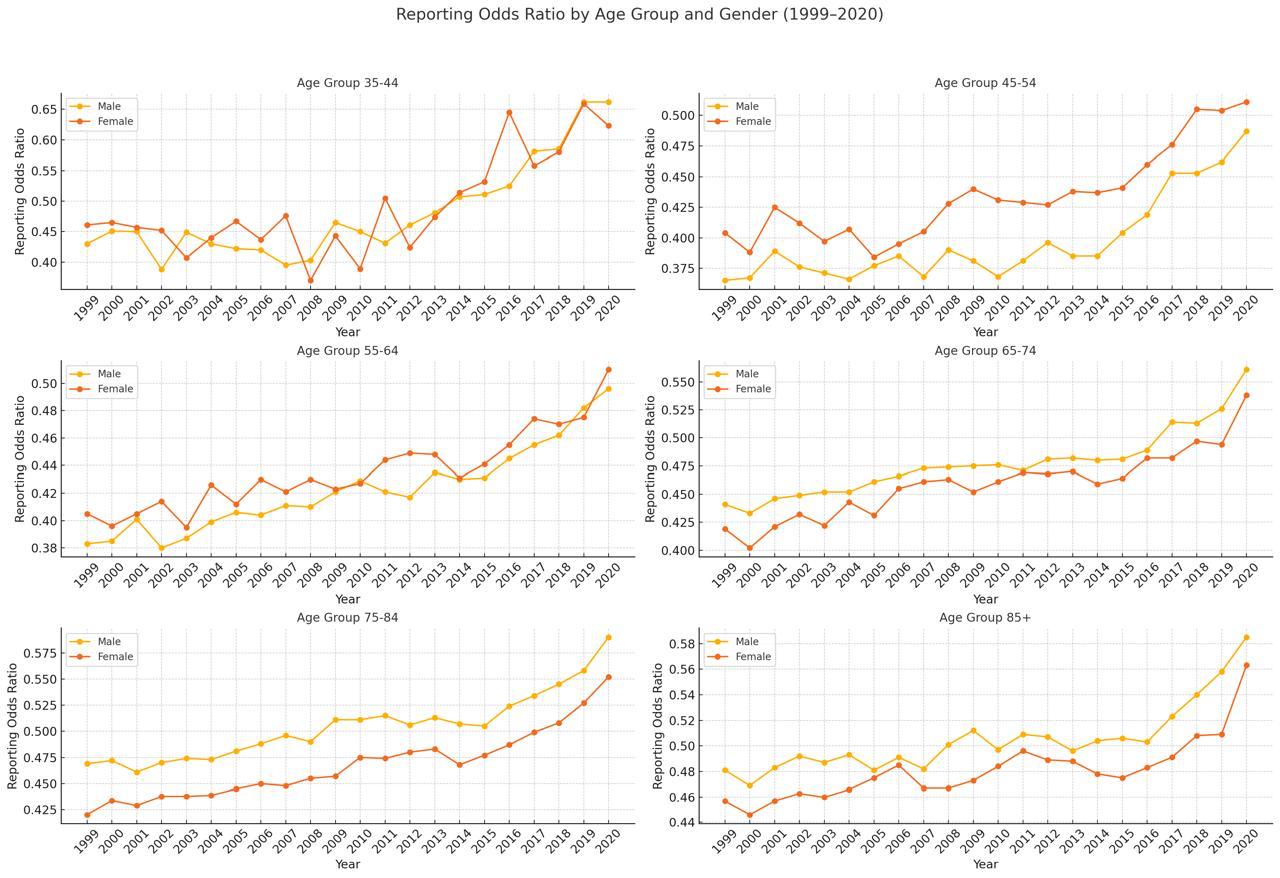


**Supplementary Figure 2:** CVD Burden in Lung Cancer-Related Reporting Odds Ratio Stratified by Sex and Age Group in the Unites States, 1999-2020


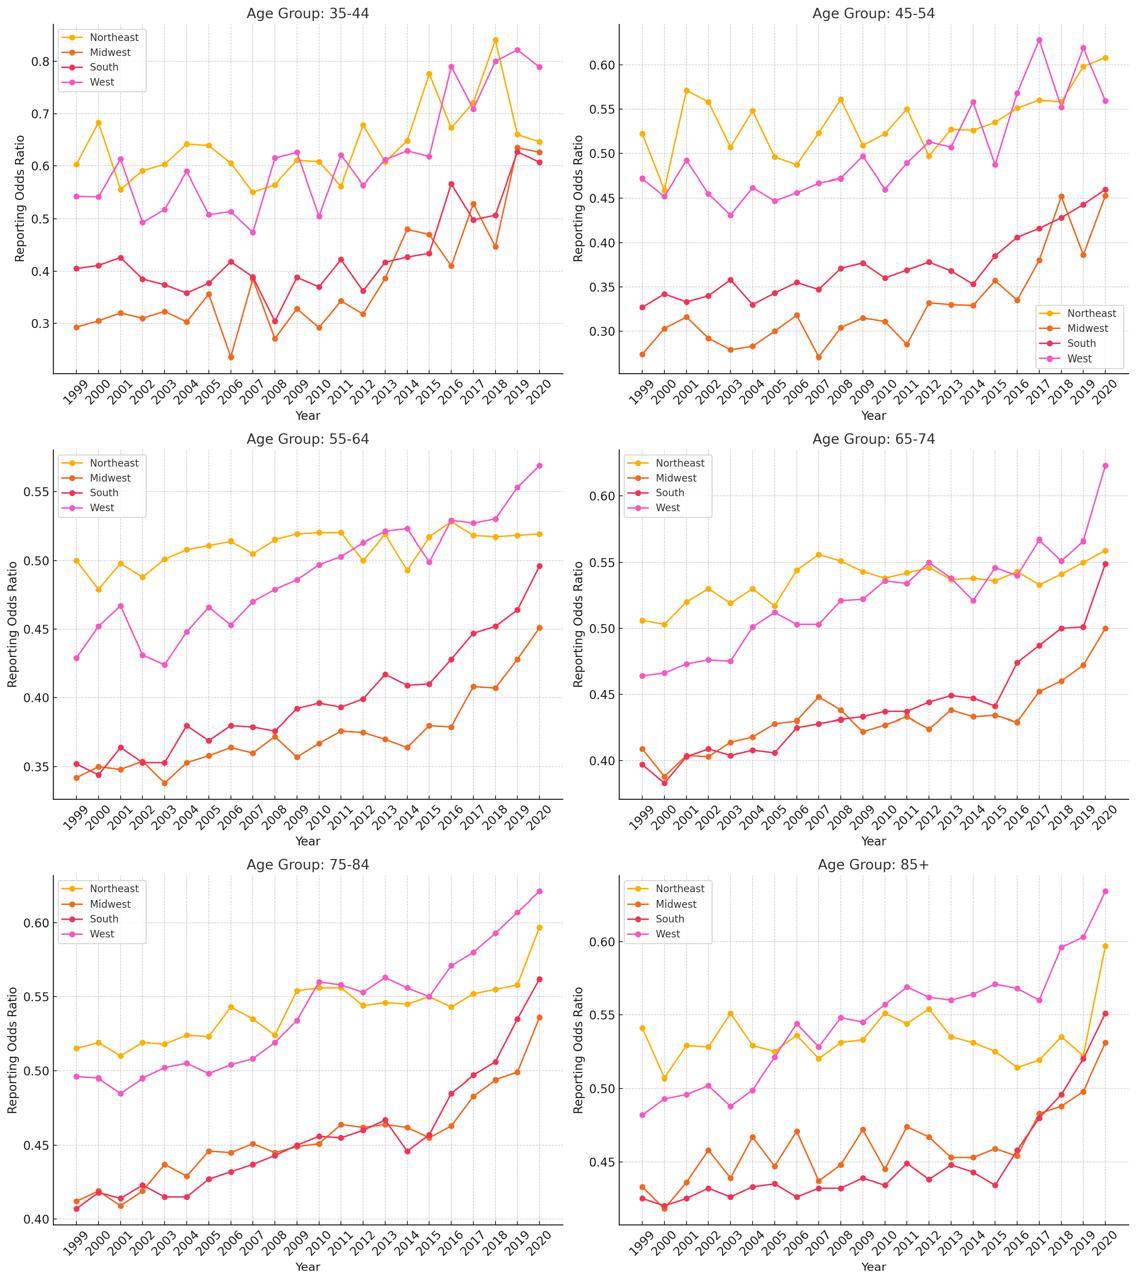


**Supplementary Figure 3:** CVD Burden in Lung Cancer-Related Reporting Odds Ratio Stratified by Region and Age Group in the Unites States, 1999-2020


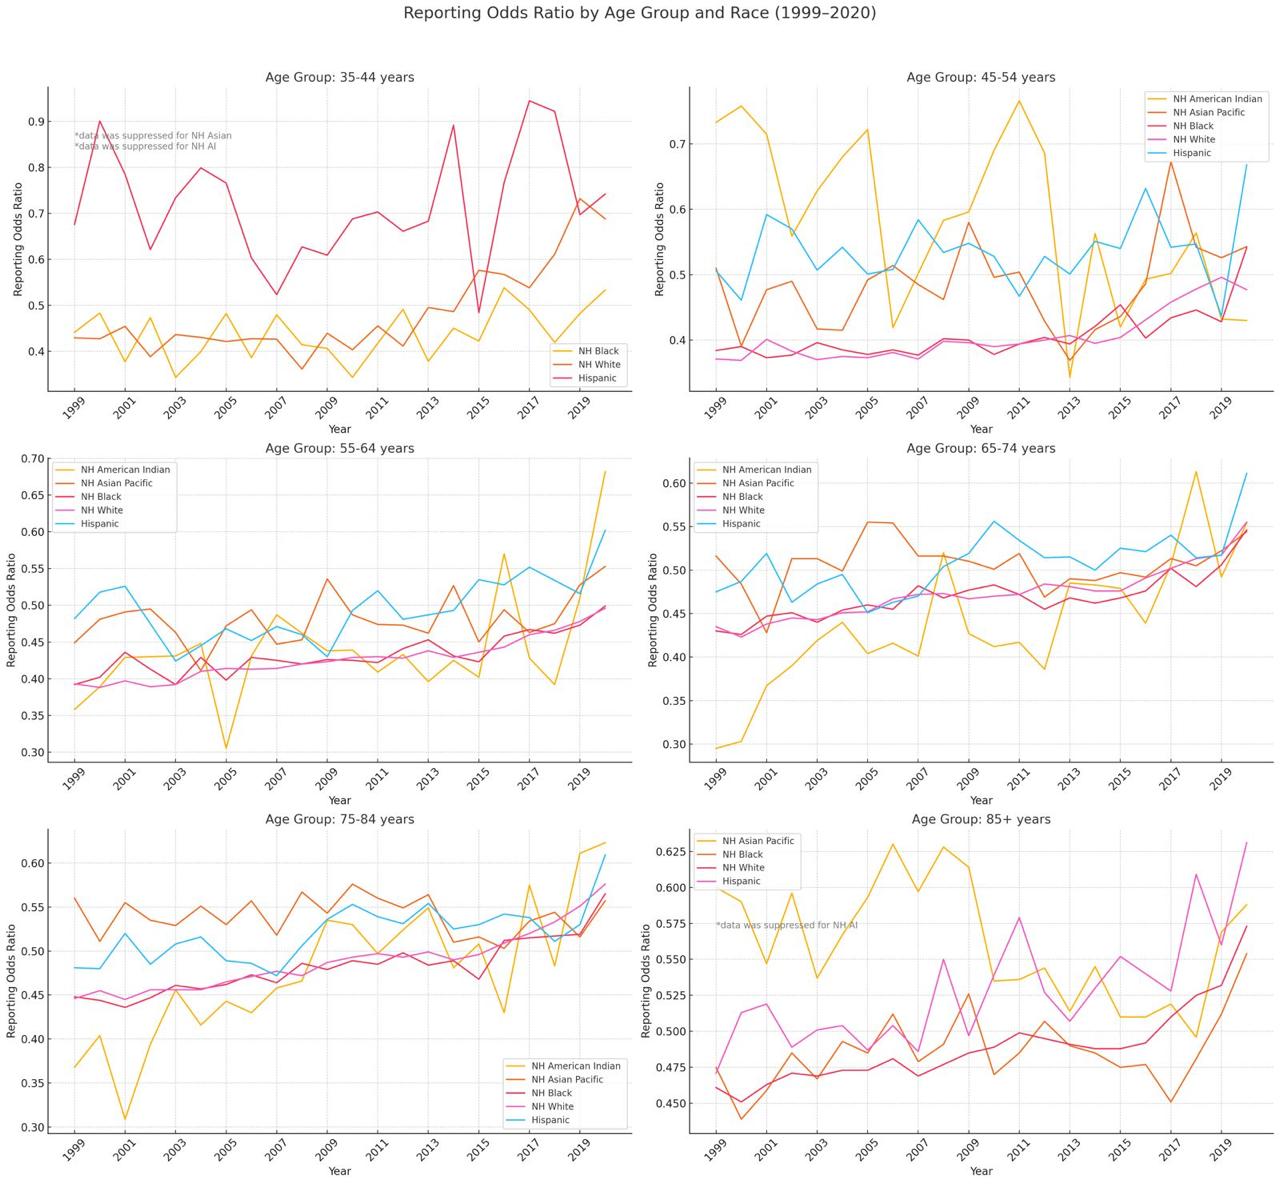


**Supplementary Figure 4:** CVD Burden in Lung Cancer-Related Reporting Odds Ratio Stratified by Race and Age Group in the Unites States, 1999-2020


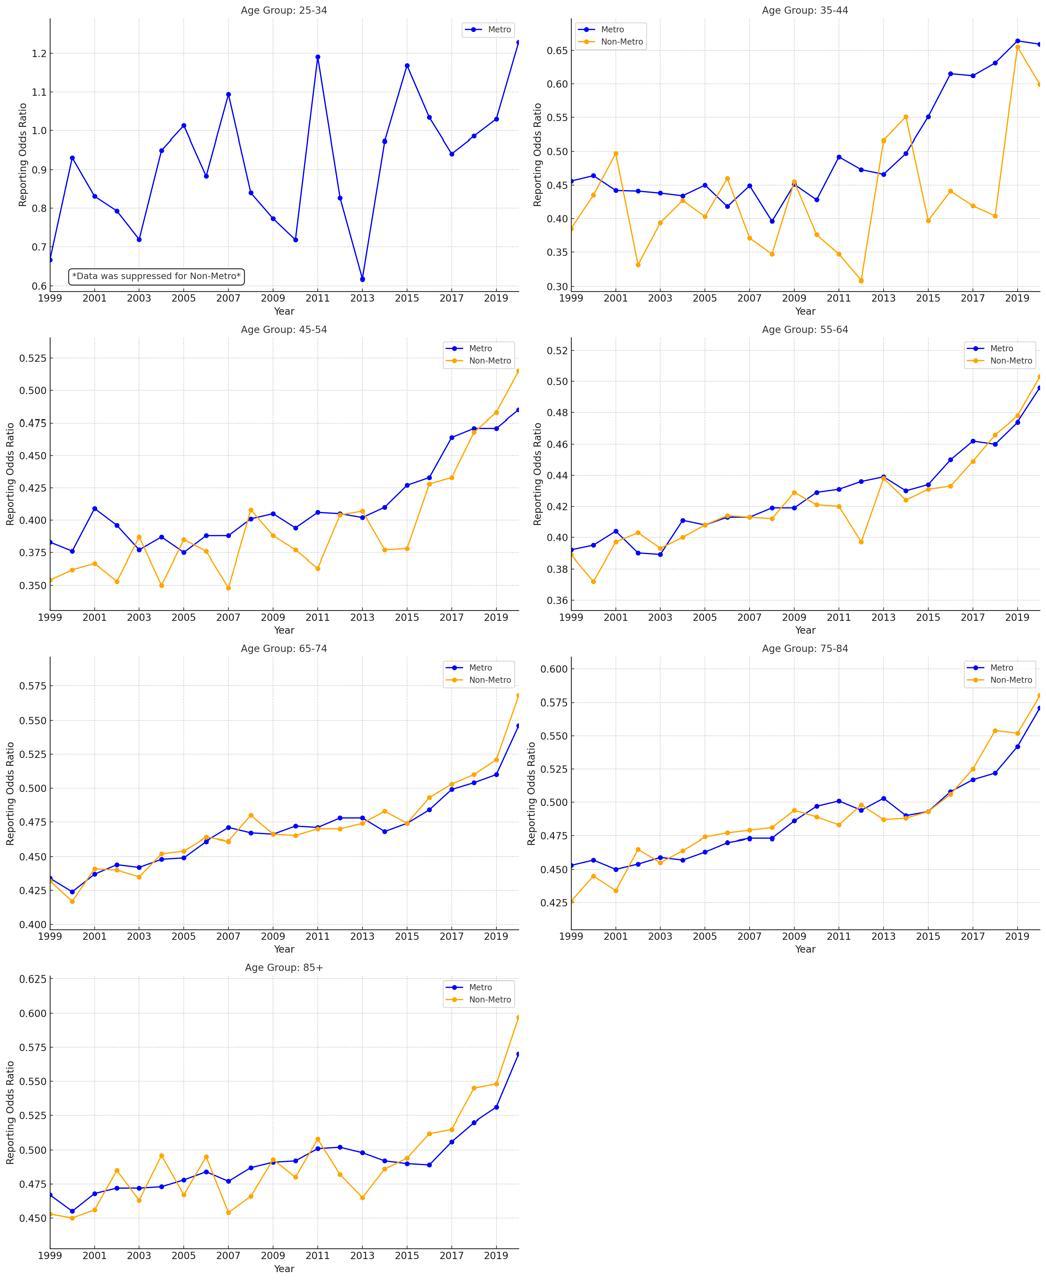


**Supplementary Figure 5:** CVD Burden in Lung Cancer-Related Reporting Odds Ratio Stratified by Urbanization and Age Group in the Unites States, 1999-2020

| **Supplementary Table 1: Total Deaths and Reporting Odds Ratio of CVD Burden in Lung Cancer in Individuals aged 15-85+ in United States from 1999-2020** | | | | | | | |
| --- | --- | --- | --- | --- | --- | --- | --- |
| **Deaths and Reporting Odds Ratio (95% CI)** | | | | | | | |
| **Cohort** | **Lung Cancer and CVD Deaths (A)** | **Total Lung Cancer Deaths (B)** | **Total CVD Deaths (C)** | **All-Cause Deaths (D)** | **A/B** | **C/D** | **ROR (95% CI)** |
| **15-24 Age Group** | | | | | | | |
| Overall | 109 | 574 | 71932 | 696479 | 0.190 | 0.103 | 1.839 (1.498-2.257) |
| Female | 48 | 239 | 25714 | 182871 | 0.201 | 0.141 | 1.428 (1.047-1.948) |
| Male | 61 | 335 | 46218 | 513608 | 0.182 | 0.090 | 2.024 (1.54-2.659) |
| NH American Indian | Suppressed | Suppressed | Suppressed | Suppressed | Suppressed | Suppressed | Suppressed |  |
| NH Asian Pacific | 8 | 26 | 2354 | 17506 | 0.308 | 0.134 | 2.288 (1.035-5.06) |
| NH Black | 25 | 122 | 18505 | 156196 | 0.205 | 0.118 | 1.73 (1.125-2.66) |
| NH White | 51 | 307 | 38523 | 389760 | 0.166 | 0.099 | 1.681 (1.249-2.261) |
| Hispanic | 25 | 112 | 11448 | 118666 | 0.223 | 0.096 | 2.314 (1.499-3.571) |
| Northeast | 20 | 93 | 11330 | 99222 | 0.215 | 0.114 | 1.883 (1.161-3.054) |
| Midwest | 15 | 110 | 14325 | 151729 | 0.136 | 0.094 | 1.444 (0.842-2.478) |
| South | 37 | 222 | 30401 | 292574 | 0.167 | 0.104 | 1.604 (1.132-2.272) |
| West | 37 | 149 | 15876 | 152954 | 0.248 | 0.104 | 2.392 (1.668-3.43) |
| Metro | 92 | 477 | 58871 | 571297 | 0.193 | 0.103 | 1.872 (1.497-2.34) |
| Non metro | 17 | 97 | 13061 | 125182 | 0.175 | 0.104 | 1.68 (1.003-2.813) |
| **25-34 Age Group** | | | | | | | |
| Overall | 556 | 3287 | 197669 | 1043043 | 0.169 | 0.190 | 0.893 (0.816-0.977) |
| Female | 252 | 1468 | 73210 | 317873 | 0.172 | 0.230 | 0.745 (0.652-0.852) |
| Male | 304 | 1819 | 124459 | 725170 | 0.167 | 0.172 | 0.974 (0.862-1.1) |
| NH American Indian | 6 | 14 | 3247 | 18799 | 0.429 | 0.173 | 2.481 (0.953-6.462) |
| NH Asian Pacific | 43 | 242 | 5837 | 25727 | 0.178 | 0.227 | 0.783 (0.566-1.085) |
| NH Black | 114 | 553 | 54190 | 228840 | 0.206 | 0.237 | 0.871 (0.711-1.065) |
| NH White | 297 | 1994 | 106559 | 613934 | 0.149 | 0.174 | 0.858 (0.76-0.97) |
| Hispanic | 96 | 471 | 27267 | 152348 | 0.204 | 0.179 | 1.139 (0.914-1.419) |
| Northeast | 142 | 609 | 30308 | 162275 | 0.233 | 0.187 | 1.248 (1.04-1.499) |
| Midwest | 71 | 693 | 39020 | 218478 | 0.102 | 0.179 | 0.574 (0.449-0.733) |
| South | 202 | 1337 | 86053 | 442618 | 0.151 | 0.194 | 0.777 (0.67-0.901) |
| West | 141 | 648 | 42288 | 219672 | 0.218 | 0.193 | 1.13 (0.942-1.357) |
| Metro | 475 | 2776 | 163401 | 870520 | 0.171 | 0.188 | 0.912 (0.827-1.005) |
| Non metro | 81 | 511 | 34268 | 172523 | 0.159 | 0.199 | 0.798 (0.631-1.009) |
| **35-44 Age Group** | | | | | | | |
| Overall | 5657 | 37108 | 591314 | 1783349 | 0.152 | 0.332 | 0.46 (0.447-0.473) |
| Female | 2711 | 17708 | 216042 | 657934 | 0.153 | 0.328 | 0.466 (0.448-0.486) |
| Male | 2946 | 19400 | 375272 | 1125415 | 0.152 | 0.333 | 0.455 (0.438-0.473) |
| NH American Indian | 28 | 199 | 8131 | 27471 | 0.141 | 0.296 | 0.475 (0.32-0.707) |
| NH Asian Pacific | 278 | 1383 | 16065 | 42385 | 0.201 | 0.379 | 0.53 (0.466-0.604) |
| NH Black | 1120 | 6383 | 153115 | 370955 | 0.175 | 0.413 | 0.425 (0.399-0.453) |
| NH White | 3736 | 26956 | 345816 | 1128801 | 0.139 | 0.306 | 0.452 (0.437-0.468) |
| Hispanic | 473 | 2086 | 66081 | 207045 | 0.227 | 0.319 | 0.71 (0.643-0.785) |
| Northeast | 1466 | 7020 | 94303 | 285852 | 0.209 | 0.330 | 0.633 (0.598-0.67) |
| Midwest | 999 | 8996 | 118991 | 372149 | 0.111 | 0.320 | 0.347 (0.325-0.371) |
| South | 2193 | 15827 | 258328 | 760726 | 0.139 | 0.340 | 0.408 (0.39-0.427) |
| West | 999 | 5265 | 119692 | 364622 | 0.190 | 0.328 | 0.578 (0.54-0.619) |
| Metro | 4626 | 29915 | 485353 | 1475982 | 0.155 | 0.329 | 0.47 (0.456-0.485) |
| Non metro | 1031 | 7193 | 105961 | 307367 | 0.143 | 0.345 | 0.416 (0.389-0.444) |
| **45-54 Age Group** | | | | | | | |
| Overall | 41425 | 237408 | 1688707 | 3869682 | 0.174 | 0.436 | 0.4 (0.396-0.404) |
| Female | 17753 | 104281 | 592787 | 1483779 | 0.170 | 0.400 | 0.426 (0.419-0.433) |
| Male | 23672 | 133127 | 1095920 | 2385903 | 0.178 | 0.459 | 0.387 (0.382-0.393) |
| NH American Indian | 377 | 1629 | 17999 | 44101 | 0.231 | 0.408 | 0.567 (0.506-0.635) |
| NH Asian Pacific | 1235 | 5501 | 39904 | 85699 | 0.225 | 0.466 | 0.482 (0.453-0.513) |
| NH Black | 8142 | 39487 | 388127 | 744429 | 0.206 | 0.521 | 0.395 (0.386-0.405) |
| NH White | 29657 | 181922 | 1085268 | 2640418 | 0.163 | 0.411 | 0.397 (0.392-0.402) |
| Hispanic | 2010 | 8498 | 150497 | 339146 | 0.237 | 0.444 | 0.533 (0.508-0.56) |
| Northeast | 9988 | 42460 | 282998 | 638744 | 0.235 | 0.443 | 0.531 (0.519-0.543) |
| Midwest | 7802 | 58868 | 349657 | 837077 | 0.133 | 0.418 | 0.317 (0.31-0.325) |
| South | 16538 | 102582 | 719654 | 1623761 | 0.161 | 0.443 | 0.364 (0.358-0.37) |
| West | 7097 | 33498 | 336398 | 770100 | 0.212 | 0.437 | 0.485 (0.473-0.498) |
| Metro | 33046 | 188920 | 1379063 | 3175567 | 0.175 | 0.434 | 0.403 (0.398-0.408) |
| Non metro | 8379 | 48488 | 309644 | 694115 | 0.173 | 0.446 | 0.387 (0.378-0.397) |
| **55-64 Age Group** | | | | | | | |
| Overall | 147406 | 698802 | 3413956 | 6885039 | 0.211 | 0.496 | 0.425 (0.423-0.428) |
| Female | 57522 | 289478 | 1239376 | 2718374 | 0.199 | 0.456 | 0.436 (0.432-0.44) |
| Male | 89884 | 409324 | 2174580 | 4166665 | 0.220 | 0.522 | 0.421 (0.418-0.424) |
| NH American Indian | 882 | 3996 | 29288 | 58938 | 0.221 | 0.497 | 0.444 (0.412-0.478) |
| NH Asian Pacific | 3248 | 12885 | 76338 | 146387 | 0.252 | 0.521 | 0.483 (0.465-0.503) |
| NH Black | 23757 | 95403 | 666271 | 1157831 | 0.249 | 0.575 | 0.433 (0.426-0.439) |
| NH White | 113537 | 563796 | 2376345 | 5021170 | 0.201 | 0.473 | 0.426 (0.423-0.428) |
| Hispanic | 5552 | 20970 | 250791 | 473412 | 0.265 | 0.530 | 0.5 (0.485-0.515) |
| Northeast | 31703 | 121560 | 586151 | 1148457 | 0.261 | 0.510 | 0.511 (0.505-0.518) |
| Midwest | 29908 | 170654 | 718988 | 1529325 | 0.175 | 0.470 | 0.373 (0.368-0.378) |
| South | 59072 | 297999 | 1430197 | 2867979 | 0.198 | 0.499 | 0.398 (0.394-0.401) |
| West | 26723 | 108589 | 678620 | 1339278 | 0.246 | 0.507 | 0.486 (0.479-0.492) |
| Metro | 116011 | 550102 | 2749327 | 5556283 | 0.211 | 0.495 | 0.426 (0.423-0.429) |
| Non metro | 31395 | 148700 | 664629 | 1328756 | 0.211 | 0.500 | 0.422 (0.417-0.427) |
| **65-74 Age Group** | | | | | | | |
| Overall | 290081 | 1142068 | 5436761 | 10034288 | 0.254 | 0.542 | 0.469 (0.467-0.471) |
| Female | 114278 | 483673 | 2244594 | 4348898 | 0.236 | 0.516 | 0.458 (0.455-0.461) |
| Male | 175803 | 658395 | 3192167 | 5685390 | 0.267 | 0.561 | 0.476 (0.473-0.478) |
| NH American Indian | 1418 | 5649 | 36239 | 64742 | 0.251 | 0.560 | 0.448 (0.422-0.476) |
| NH Asian Pacific | 5980 | 20169 | 123773 | 211916 | 0.296 | 0.584 | 0.508 (0.493-0.523) |
| NH Black | 33814 | 117325 | 804351 | 1309819 | 0.288 | 0.614 | 0.469 (0.464-0.475) |
| NH White | 237764 | 962264 | 4109156 | 7835707 | 0.247 | 0.524 | 0.471 (0.469-0.473) |
| Hispanic | 10328 | 34070 | 344198 | 580953 | 0.303 | 0.592 | 0.512 (0.5-0.523) |
| Northeast | 60540 | 199990 | 991172 | 1754344 | 0.303 | 0.565 | 0.536 (0.531-0.541) |
| Midwest | 61313 | 275883 | 1176110 | 2280440 | 0.222 | 0.516 | 0.431 (0.427-0.435) |
| South | 111684 | 472374 | 2196329 | 4086490 | 0.236 | 0.537 | 0.44 (0.437-0.443) |
| West | 56544 | 193821 | 1073150 | 1913014 | 0.292 | 0.561 | 0.52 (0.515-0.525) |
| Metro | 227359 | 896824 | 4325213 | 7988242 | 0.254 | 0.541 | 0.468 (0.466-0.47) |
| Non metro | 62722 | 245244 | 1111548 | 2046046 | 0.256 | 0.543 | 0.471 (0.467-0.475) |
| **75-84 Age Group** | | | | | | | |
| Overall | 313454 | 1078114 | 8811638 | 14723222 | 0.291 | 0.598 | 0.486 (0.484-0.488) |
| Female | 134068 | 486916 | 4374987 | 7382049 | 0.275 | 0.593 | 0.465 (0.462-0.467) |
| Male | 179386 | 591198 | 4436651 | 7341173 | 0.303 | 0.604 | 0.502 (0.499-0.505) |
| NH American Indian | 1122 | 3824 | 36771 | 61070 | 0.293 | 0.602 | 0.487 (0.455-0.521) |
| NH Asian Pacific | 7272 | 20919 | 191772 | 297725 | 0.348 | 0.644 | 0.54 (0.525-0.555) |
| NH Black | 26524 | 85188 | 884453 | 1367405 | 0.311 | 0.647 | 0.481 (0.475-0.488) |
| NH White | 266948 | 933634 | 7215497 | 12244092 | 0.286 | 0.589 | 0.485 (0.483-0.487) |
| Hispanic | 10984 | 32687 | 462615 | 721210 | 0.336 | 0.641 | 0.524 (0.513-0.535) |
| Northeast | 70121 | 208339 | 1775939 | 2839920 | 0.337 | 0.625 | 0.538 (0.534-0.543) |
| Midwest | 67898 | 260093 | 2007048 | 3472785 | 0.261 | 0.578 | 0.452 (0.448-0.456) |
| South | 109144 | 410733 | 3277507 | 5592404 | 0.266 | 0.586 | 0.453 (0.45-0.457) |
| West | 66291 | 198949 | 1751144 | 2818113 | 0.333 | 0.621 | 0.536 (0.531-0.541) |
| Metro | 251604 | 867206 | 7063713 | 11821779 | 0.290 | 0.598 | 0.486 (0.483-0.488) |
| Non metro | 61850 | 210908 | 1747925 | 2901443 | 0.293 | 0.602 | 0.487 (0.482-0.491) |
| **85+ Age Group** | | | | | | | |
| Overall | 130831 | 404186 | 11162674 | 16979000 | 0.324 | 0.657 | 0.492 (0.489-0.495) |
| Female | 65718 | 207272 | 7182135 | 10883756 | 0.317 | 0.660 | 0.48 (0.476-0.485) |
| Male | 65113 | 196914 | 3980539 | 6095244 | 0.331 | 0.653 | 0.506 (0.502-0.511) |
| NH American Indian | 321 | 1044 | 26972 | 42672 | 0.307 | 0.632 | 0.486 (0.429-0.552) |
| NH Asian Pacific | 3712 | 9714 | 226433 | 328516 | 0.382 | 0.689 | 0.554 (0.534-0.576) |
| NH Black | 8909 | 27277 | 785500 | 1169730 | 0.327 | 0.672 | 0.486 (0.475-0.498) |
| NH White | 112756 | 352068 | 9633475 | 14718613 | 0.320 | 0.655 | 0.489 (0.486-0.493) |
| Hispanic | 4902 | 13389 | 470114 | 689855 | 0.366 | 0.681 | 0.537 (0.52-0.555) |
| Northeast | 31779 | 86871 | 2484855 | 3627082 | 0.366 | 0.685 | 0.534 (0.527-0.541) |
| Midwest | 28111 | 95050 | 2696400 | 4199415 | 0.296 | 0.642 | 0.461 (0.454-0.467) |
| South | 40246 | 140385 | 3699313 | 5807840 | 0.287 | 0.637 | 0.45 (0.445-0.455) |
| West | 30695 | 81880 | 2282106 | 3344663 | 0.375 | 0.682 | 0.549 (0.542-0.557) |
| Metro | 108100 | 334337 | 9037541 | 13772027 | 0.323 | 0.656 | 0.493 (0.489-0.496) |
| Non metro | 22731 | 69849 | 2125133 | 3206973 | 0.325 | 0.663 | 0.491 (0.484-0.499) |

| **Supplementary Table 2: Annual Trends in the cardiovascular disease (CVD) Burden Among Lung Cancer–Related and Non-Cancer Deaths with Corresponding Reporting Odds Ratios (RORs) in Individuals aged 15-85+ in United States from 1999-2020** | | | |
| --- | --- | --- | --- |
| **Year** | **CVD Burden in Lung Cancer Deaths (A/B)** | **CVD Burden in Lung Cancer Deaths (C/D)** | **ROR (95% CI)** |
| **15-24 Age Group** | | | |
| **1999** | Suppressed | Suppressed | Suppressed |
| **2000** | Suppressed | Suppressed | Suppressed |
| **2001** | Suppressed | Suppressed | Suppressed |
| **2002** | Suppressed | Suppressed | Suppressed |
| **2003** | Suppressed | Suppressed | Suppressed |
| **2004** | Suppressed | Suppressed | Suppressed |
| **2005** | Suppressed | Suppressed | Suppressed |
| **2006** | Suppressed | Suppressed | Suppressed |
| **2007** | Suppressed | Suppressed | Suppressed |
| **2008** | Suppressed | Suppressed | Suppressed |
| **2009** | Suppressed | Suppressed | Suppressed |
| **2010** | Suppressed | Suppressed | Suppressed |
| **2011** | Suppressed | Suppressed | Suppressed |
| **2012** | Suppressed | Suppressed | Suppressed |
| **2013** | Suppressed | Suppressed | Suppressed |
| **2014** | Suppressed | Suppressed | Suppressed |
| **2015** | Suppressed | Suppressed | Suppressed |
| **2016** | Suppressed | Suppressed | Suppressed |
| **2017** | Suppressed | Suppressed | Suppressed |
| **2018** | Suppressed | Suppressed | Suppressed |
| **2019** | Suppressed | Suppressed | Suppressed |
| **2020** | Suppressed | Suppressed | Suppressed |
| **25-34 Age Group** | | | |
| **1999** | 0.122 | 0.196 | 0.623 (0.404-0.962) |
| **2000** | 0.168 | 0.185 | 0.908 (0.631-1.307) |
| **2001** | 0.146 | 0.184 | 0.792 (0.511-1.227) |
| **2002** | 0.152 | 0.190 | 0.799 (0.524-1.218) |
| **2003** | 0.148 | 0.195 | 0.761 (0.49-1.179) |
| **2004** | 0.162 | 0.196 | 0.828 (0.542-1.265) |
| **2005** | 0.176 | 0.193 | 0.911 (0.595-1.394) |
| **2006** | 0.155 | 0.193 | 0.803 (0.526-1.224) |
| **2007** | 0.184 | 0.191 | 0.966 (0.636-1.469) |
| **2008** | 0.168 | 0.196 | 0.857 (0.561-1.31) |
| **2009** | 0.148 | 0.198 | 0.746 (0.477-1.168) |
| **2010** | 0.161 | 0.200 | 0.803 (0.534-1.206) |
| **2011** | 0.215 | 0.197 | 1.092 (0.725-1.644) |
| **2012** | 0.183 | 0.195 | 0.94 (0.648-1.363) |
| **2013** | 0.124 | 0.195 | 0.635 (0.377-1.068) |
| **2014** | 0.194 | 0.197 | 0.986 (0.648-1.502) |
| **2015** | 0.208 | 0.188 | 1.108 (0.747-1.643) |
| **2016** | 0.170 | 0.175 | 0.974 (0.626-1.516) |
| **2017** | 0.174 | 0.178 | 0.977 (0.615-1.554) |
| **2018** | 0.183 | 0.182 | 1.004 (0.65-1.552) |
| **2019** | 0.174 | 0.182 | 0.953 (0.593-1.534) |
| **2020** | 0.235 | 0.182 | 1.293 (0.879-1.901) |
| **35-44 Age Group** | | | |
| **1999** | 0.148 | 0.333 | 0.444 (0.4-0.492) |
| **2000** | 0.145 | 0.316 | 0.458 (0.412-0.509) |
| **2001** | 0.140 | 0.309 | 0.454 (0.408-0.504) |
| **2002** | 0.133 | 0.319 | 0.419 (0.375-0.467) |
| **2003** | 0.139 | 0.324 | 0.429 (0.384-0.481) |
| **2004** | 0.145 | 0.335 | 0.433 (0.387-0.484) |
| **2005** | 0.147 | 0.332 | 0.441 (0.394-0.495) |
| **2006** | 0.143 | 0.334 | 0.426 (0.377-0.482) |
| **2007** | 0.145 | 0.334 | 0.433 (0.381-0.492) |
| **2008** | 0.130 | 0.336 | 0.386 (0.334-0.446) |
| **2009** | 0.154 | 0.340 | 0.452 (0.394-0.518) |
| **2010** | 0.143 | 0.343 | 0.417 (0.359-0.485) |
| **2011** | 0.159 | 0.343 | 0.463 (0.4-0.537) |
| **2012** | 0.151 | 0.343 | 0.44 (0.376-0.514) |
| **2013** | 0.165 | 0.347 | 0.474 (0.407-0.553) |
| **2014** | 0.177 | 0.349 | 0.508 (0.437-0.59) |
| **2015** | 0.175 | 0.337 | 0.52 (0.444-0.609) |
| **2016** | 0.191 | 0.329 | 0.581 (0.494-0.683) |
| **2017** | 0.185 | 0.325 | 0.571 (0.482-0.676) |
| **2018** | 0.192 | 0.329 | 0.585 (0.492-0.694) |
| **2019** | 0.216 | 0.326 | 0.663 (0.563-0.781) |
| **2020** | 0.213 | 0.329 | 0.648 (0.549-0.764) |
| **45-54 Age Group** | | | |
| **1999** | 0.169 | 0.447 | 0.378 (0.36-0.397) |
| **2000** | 0.163 | 0.435 | 0.373 (0.356-0.392) |
| **2001** | 0.172 | 0.429 | 0.401 (0.383-0.42) |
| **2002** | 0.167 | 0.431 | 0.388 (0.37-0.407) |
| **2003** | 0.163 | 0.431 | 0.379 (0.362-0.398) |
| **2004** | 0.165 | 0.433 | 0.38 (0.363-0.398) |
| **2005** | 0.161 | 0.428 | 0.377 (0.36-0.395) |
| **2006** | 0.166 | 0.430 | 0.386 (0.369-0.405) |
| **2007** | 0.163 | 0.429 | 0.38 (0.362-0.398) |
| **2008** | 0.172 | 0.426 | 0.402 (0.384-0.421) |
| **2009** | 0.172 | 0.428 | 0.402 (0.384-0.421) |
| **2010** | 0.167 | 0.428 | 0.39 (0.372-0.409) |
| **2011** | 0.170 | 0.429 | 0.397 (0.378-0.416) |
| **2012** | 0.173 | 0.428 | 0.405 (0.386-0.425) |
| **2013** | 0.177 | 0.438 | 0.403 (0.384-0.424) |
| **2014** | 0.176 | 0.437 | 0.403 (0.383-0.424) |
| **2015** | 0.183 | 0.439 | 0.416 (0.395-0.439) |
| **2016** | 0.192 | 0.443 | 0.432 (0.409-0.457) |
| **2017** | 0.204 | 0.445 | 0.458 (0.433-0.485) |
| **2018** | 0.213 | 0.453 | 0.471 (0.444-0.499) |
| **2019** | 0.216 | 0.455 | 0.474 (0.446-0.505) |
| **2020** | 0.228 | 0.463 | 0.493 (0.463-0.525) |
| **55-64 Age Group** | | | |
| **1999** | 0.203 | 0.518 | 0.391 (0.381-0.403) |
| **2000** | 0.200 | 0.513 | 0.39 (0.379-0.401) |
| **2001** | 0.204 | 0.507 | 0.403 (0.392-0.414) |
| **2002** | 0.198 | 0.505 | 0.393 (0.382-0.404) |
| **2003** | 0.195 | 0.500 | 0.39 (0.379-0.401) |
| **2004** | 0.203 | 0.496 | 0.409 (0.398-0.42) |
| **2005** | 0.202 | 0.495 | 0.408 (0.397-0.419) |
| **2006** | 0.204 | 0.493 | 0.413 (0.402-0.425) |
| **2007** | 0.202 | 0.489 | 0.413 (0.402-0.425) |
| **2008** | 0.203 | 0.488 | 0.417 (0.406-0.429) |
| **2009** | 0.203 | 0.483 | 0.421 (0.41-0.433) |
| **2010** | 0.206 | 0.483 | 0.427 (0.416-0.439) |
| **2011** | 0.207 | 0.482 | 0.429 (0.417-0.44) |
| **2012** | 0.206 | 0.482 | 0.428 (0.417-0.44) |
| **2013** | 0.213 | 0.484 | 0.439 (0.427-0.451) |
| **2014** | 0.208 | 0.486 | 0.429 (0.417-0.44) |
| **2015** | 0.212 | 0.489 | 0.433 (0.422-0.445) |
| **2016** | 0.219 | 0.491 | 0.447 (0.435-0.459) |
| **2017** | 0.229 | 0.499 | 0.46 (0.448-0.472) |
| **2018** | 0.233 | 0.504 | 0.462 (0.45-0.474) |
| **2019** | 0.241 | 0.508 | 0.475 (0.463-0.488) |
| **2020** | 0.258 | 0.518 | 0.498 (0.485-0.511) |
| **65-74 Age Group** | | | |
| **1999** | 0.249 | 0.575 | 0.433 (0.425-0.442) |
| **2000** | 0.240 | 0.569 | 0.422 (0.414-0.431) |
| **2001** | 0.247 | 0.565 | 0.438 (0.429-0.446) |
| **2002** | 0.249 | 0.561 | 0.443 (0.434-0.452) |
| **2003** | 0.246 | 0.558 | 0.441 (0.432-0.45) |
| **2004** | 0.247 | 0.550 | 0.449 (0.44-0.458) |
| **2005** | 0.245 | 0.544 | 0.45 (0.441-0.459) |
| **2006** | 0.250 | 0.540 | 0.462 (0.453-0.471) |
| **2007** | 0.251 | 0.535 | 0.469 (0.459-0.478) |
| **2008** | 0.249 | 0.530 | 0.47 (0.46-0.479) |
| **2009** | 0.246 | 0.529 | 0.466 (0.457-0.475) |
| **2010** | 0.247 | 0.525 | 0.47 (0.461-0.48) |
| **2011** | 0.246 | 0.523 | 0.471 (0.462-0.481) |
| **2012** | 0.249 | 0.522 | 0.476 (0.467-0.486) |
| **2013** | 0.250 | 0.524 | 0.477 (0.468-0.486) |
| **2014** | 0.247 | 0.523 | 0.472 (0.462-0.481) |
| **2015** | 0.250 | 0.527 | 0.474 (0.465-0.483) |
| **2016** | 0.259 | 0.533 | 0.486 (0.477-0.496) |
| **2017** | 0.269 | 0.539 | 0.5 (0.49-0.51) |
| **2018** | 0.274 | 0.543 | 0.506 (0.496-0.516) |
| **2019** | 0.281 | 0.549 | 0.512 (0.502-0.522) |
| **2020** | 0.304 | 0.551 | 0.551 (0.54-0.561) |
| **75-84 Age Group** | | | |
| **1999** | 0.290 | 0.649 | 0.448 (0.439-0.457) |
| **2000** | 0.293 | 0.643 | 0.455 (0.446-0.463) |
| **2001** | 0.285 | 0.637 | 0.447 (0.438-0.455) |
| **2002** | 0.288 | 0.632 | 0.456 (0.448-0.464) |
| **2003** | 0.287 | 0.626 | 0.458 (0.45-0.467) |
| **2004** | 0.283 | 0.619 | 0.458 (0.45-0.467) |
| **2005** | 0.284 | 0.611 | 0.465 (0.456-0.474) |
| **2006** | 0.284 | 0.603 | 0.471 (0.463-0.48) |
| **2007** | 0.284 | 0.599 | 0.475 (0.466-0.484) |
| **2008** | 0.281 | 0.592 | 0.475 (0.466-0.484) |
| **2009** | 0.287 | 0.588 | 0.487 (0.478-0.497) |
| **2010** | 0.289 | 0.583 | 0.495 (0.486-0.505) |
| **2011** | 0.288 | 0.579 | 0.497 (0.488-0.507) |
| **2012** | 0.284 | 0.574 | 0.495 (0.485-0.505) |
| **2013** | 0.288 | 0.576 | 0.5 (0.49-0.51) |
| **2014** | 0.280 | 0.572 | 0.49 (0.48-0.5) |
| **2015** | 0.283 | 0.574 | 0.493 (0.483-0.503) |
| **2016** | 0.292 | 0.575 | 0.508 (0.498-0.518) |
| **2017** | 0.299 | 0.577 | 0.519 (0.509-0.529) |
| **2018** | 0.307 | 0.580 | 0.528 (0.518-0.539) |
| **2019** | 0.318 | 0.584 | 0.544 (0.534-0.555) |
| **2020** | 0.331 | 0.578 | 0.573 (0.562-0.584) |
| **85+ Age Group** | | | |
| **1999** | 0.332 | 0.716 | 0.464 (0.449-0.48) |
| **2000** | 0.323 | 0.712 | 0.454 (0.439-0.469) |
| **2001** | 0.328 | 0.705 | 0.466 (0.451-0.481) |
| **2002** | 0.332 | 0.699 | 0.474 (0.459-0.49) |
| **2003** | 0.326 | 0.692 | 0.471 (0.456-0.486) |
| **2004** | 0.328 | 0.687 | 0.477 (0.462-0.492) |
| **2005** | 0.323 | 0.677 | 0.476 (0.462-0.491) |
| **2006** | 0.326 | 0.671 | 0.486 (0.472-0.501) |
| **2007** | 0.315 | 0.666 | 0.473 (0.459-0.488) |
| **2008** | 0.317 | 0.657 | 0.483 (0.469-0.497) |
| **2009** | 0.320 | 0.653 | 0.491 (0.477-0.505) |
| **2010** | 0.317 | 0.647 | 0.49 (0.476-0.504) |
| **2011** | 0.321 | 0.639 | 0.502 (0.488-0.517) |
| **2012** | 0.317 | 0.635 | 0.498 (0.484-0.512) |
| **2013** | 0.312 | 0.633 | 0.493 (0.479-0.507) |
| **2014** | 0.310 | 0.632 | 0.491 (0.478-0.505) |
| **2015** | 0.311 | 0.634 | 0.49 (0.477-0.504) |
| **2016** | 0.313 | 0.634 | 0.493 (0.48-0.507) |
| **2017** | 0.323 | 0.636 | 0.507 (0.493-0.521) |
| **2018** | 0.335 | 0.638 | 0.524 (0.51-0.539) |
| **2019** | 0.342 | 0.641 | 0.534 (0.519-0.548) |
| **2020** | 0.361 | 0.628 | 0.575 (0.559-0.591) |

| **Supplementary Table 3: Average Annual Percent Change (AAPC) of CVD Burden in Lung Cancer, related Reporting Odds Ratio in the United States, 1999 to 2020** | | | | | |
| --- | --- | --- | --- | --- | --- |
| **Reporting Odds Ratio AAPC (1999-2020)** | | | | | |
| **Age Group** | **AAPC (95% CI)** | **p-value** | **Age Group** | **AAPC (95% CI)** | **p-value** |
| **Overall** | | | | | |
| 15-24 | Suppressed | Suppressed | 55-64 | 1.13* (0.98-1.25) | < 0.000001 |
| 25-34 | 1.86* (1.03-2.92) | < 0.000001 | 65-74 | 1.13* (0.97-1.25) | < 0.000001 |
| 35-44 | 1.90* (1.55-2.23) | < 0.000001 | 75-84 | 1.16* (1.05-1.37) | < 0.000001 |
| 45-54 | 1.32* (1.06-1.56) | < 0.000001 | 85+ | 1.00* (0.9-1.15) | < 0.000001 |
| **CVD Burden in Lung Cancer Deaths (A/B)** | | | | | |
| 15-24 | Suppressed | Suppressed | 55-64 | 1.19* (1.05-1.33) | < 0.000001 |
| 25-34 | 1.62* (0.61-2.86) | 0.004799 | 65-74 | 0.93* (0.82-1.03) | < 0.000001 |
| 35-44 | 1.89* (1.49-2.32) | < 0.000001 | 75-84 | 0.63* (0.51-0.73) | < 0.000001 |
| 45-54 | 1.46* (1.26-1.69) | < 0.000001 | 85+ | 0.39* (0.3-0.48) | < 0.000001 |
| **CVD Burden All Cause Deaths (C/D)** | | | | | |
| 15-24 | Suppressed | Suppressed | 55-64 | -0.01 (-0.03-0.02) | 0.713457 |
| 25-34 | -0.17 (-0.47-0.09) | 0.153169 | 65-74 | -0.18* (-0.21--0.16) | < 0.000001 |
| 35-44 | -0.03 (-0.12-0.09) | 0.492701 | 75-84 | -0.53* (-0.56--0.5) | < 0.000001 |
| 45-54 | 0.16* (0.09-0.25) | < 0.000001 | 85+ | -0.58* (-0.62--0.55) | < 0.000001 |
| **Female** | | | | | |
| 15-24 | Suppressed | Suppressed | 55-64 | 1.05* (0.78-1.28) | < 0.000001 |
| 25-34 | Suppressed | Suppressed | 65-74 | 1.15* (0.85-1.33) | < 0.000001 |
| 35-44 | 1.77* (1.09-2.42) | < 0.000001 | 75-84 | 1.24* (1.1-1.35) | < 0.000001 |
| 45-54 | 1.29* (0.93-1.61) | < 0.000001 | 85+ | 0.94* (0.62-1.14) | < 0.000001 |
| **Male** | | | | | |
| 15-24 | Suppressed | Suppressed | 55-64 | 1.23* (1.08-1.37) | < 0.000001 |
| 25-34 | Suppressed | Suppressed | 65-74 | 1.08* (0.92-1.21) | < 0.000001 |
| 35-44 | 2.07* (1.64-2.46) | < 0.000001 | 75-84 | 1.01* (0.91-1.16) | < 0.000001 |
| 45-54 | 1.34* (1.14-1.55) | < 0.000001 | 85+ | 0.90* (0.75-1.05) | < 0.000001 |
| **NH American Indian or Alaskan Native** | | | | | |
| 15-24 | Suppressed | Suppressed | 55-64 | 2.32* (1.25-3.4) | 0.008798 |
| 25-34 | Suppressed | Suppressed | 65-74 | 2.07* (1.4-3.09) | < 0.000001 |
| 35-44 | Suppressed | Suppressed | 75-84 | 2.01* (1.44-2.9) | < 0.000001 |
| 45-54 | -1.77* (-3.11--0.58) | 0.007598 | 85+ | Suppressed | Suppressed |
| **NH Asian or Pacific Islander** | | | | | |
| 15-24 | Suppressed | Suppressed | 55-64 | 0.77* (0-1.39) | 0.04999 |
| 25-34 | Suppressed | Suppressed | 65-74 | 0.17 (-0.13-0.75) | 0.245951 |
| 35-44 | Suppressed | Suppressed | 75-84 | -0.1 (-0.44-0.31) | 0.65227 |
| 45-54 | 0.94 (-0.01-2.11) | 0.05199 | 85+ | 0.25 (-0.38-1.32) | 0.304339 |
| **NH Black or African American** | | | | | |
| 15-24 | Suppressed | Suppressed | 55-64 | 0.93* (0.54-1.3) | < 0.000001 |
| 25-34 | Suppressed | Suppressed | 65-74 | 1.00* (0.64-1.22) | < 0.000001 |
| 35-44 | 0.46 (-0.71-1.33) | 0.513497 | 75-84 | 1.12* (0.79-1.3) | < 0.000001 |
| 45-54 | 1.66* (0.84-2.05) | < 0.000001 | 85+ | 0.85* (0.51-1.29) | 0.0004 |
| **NH White** | | | | | |
| 15-24 | Suppressed | Suppressed | 55-64 | 1.14* (1.02-1.25) | < 0.000001 |
| 25-34 | Suppressed | Suppressed | 65-74 | 1.16* (1.04-1.34) | < 0.000001 |
| 35-44 | 2.37* (1.84-2.89) | < 0.000001 | 75-84 | 1.23* (1.11-1.33) | < 0.000001 |
| 45-54 | 1.43* (1.03-1.76) | < 0.000001 | 85+ | 1.00* (0.85-1.13) | < 0.000001 |
| **Hispanic or Latino** | | | | | |
| 15-24 | Suppressed | Suppressed | 55-64 | 0.39 (-0.1-1.13) | 0.122376 |
| 25-34 | Suppressed | Suppressed | 65-74 | 1.03* (0.43-1.46) | 0.0004 |
| 35-44 | 0.44 (-0.66-1.67) | 0.411118 | 75-84 | 0.70* (0.35-1.14) | 0.0012 |
| 45-54 | 0.48 (-0.17-1.18) | 0.145571 | 85+ | 0.99* (0.57-1.59) | 0.0004 |
| **Northeast region** | | | | | |
| 15-24 | Suppressed | Suppressed | Suppressed | 0.25* (0.09-0.42) | 0.0024 |
| 25-34 | Suppressed | Suppressed | Suppressed | 0.49* (0.3-0.63) | < 0.000001 |
| 35-44 | 0.79 (-0.08-1.48) | 0.078784 | 75-84 | 0.50* (0.35-0.65) | < 0.000001 |
| 45-54 | 0.38 (-0.13-0.85) | 0.159568 | 85+ | 0.41* (0.06-0.63) | 0.023995 |
| **Midwest region** | | | | | |
| 15-24 | Suppressed | Suppressed | 55-64 | 1.28* (1.12-1.44) | < 0.000001 |
| 25-34 | Suppressed | Suppressed | 65-74 | 1.09* (0.91-1.3) | < 0.000001 |
| 35-44 | 3.54* (2.6-4.54) | < 0.000001 | 75-84 | 1.23* (1.05-1.51) | < 0.000001 |
| 45-54 | 1.98* (1.21-2.74) | < 0.000001 | 85+ | 0.81* (0.5-1.07) | < 0.000001 |
| **South region** | | | | | |
| 15-24 | Suppressed | Suppressed | 55-64 | 1.62* (1.4-1.82) | < 0.000001 |
| 25-34 | Suppressed | Suppressed | 65-74 | 1.50* (1.35-1.66) | < 0.000001 |
| 35-44 | 1.99* (1.15-2.79) | < 0.000001 | 75-84 | 1.46* (1.3-1.63) | < 0.000001 |
| 45-54 | 1.53* (1.25-1.81) | < 0.000001 | 85+ | 1.20* (1.09-1.32) | < 0.000001 |
| **West region** | | | | | |
| 15-24 | Suppressed | Suppressed | 55-64 | 1.22* (1.02-1.47) | < 0.000001 |
| 25-34 | Suppressed | Suppressed | 65-74 | 1.39* (1.22-1.59) | < 0.000001 |
| 35-44 | 1.79* (0.92-2.79) | < 0.000001 | 75-84 | 1.11* (1.03-1.21) | < 0.000001 |
| 45-54 | 1.17* (0.66-1.84) | 0.0004 | 85+ | 1.33* (1.2-1.5) | < 0.000001 |
| **Metropolitan area** | | | | | |
| 15-24 | Suppressed | Suppressed | 55-64 | 1.07* (0.9-1.22) | < 0.000001 |
| 25-34 | 1.42* (0.22-2.88) | 0.027195 | 65-74 | 1.08* (0.92-1.2) | < 0.000001 |
| 35-44 | 1.86* (1.47-2.27) | < 0.000001 | 75-84 | 1.17* (0.94-1.3) | < 0.000001 |
| 45-54 | 1.18* (0.91-1.44) | < 0.000001 | 85+ | 0.96* (0.88-1.06) | < 0.000001 |
| **Nonmetropolitan areas** | | | | | |
| 15-24 | Suppressed | Suppressed | 55-64 | 1.20* (0.98-1.4) | < 0.000001 |
| 25-34 | Suppressed | Suppressed | 65-74 | 1.30* (1.12-1.45) | < 0.000001 |
| 35-44 | 1.41 (-0.07-2.66) | 0.060788 | 75-84 | 1.41* (1.28-1.58) | < 0.000001 |
| 45-54 | 1.71* (1.14-2.13) | < 0.000001 | 85+ | 1.10* (0.76-1.41) | < 0.000001 |
| AAPC = average annual percent change; N.H. = non-Hispanic; * Indicates that the average annual percentage change (AAPC) is significantly different from zero at α = 0.05. | | | | | |

| **Supplementary Table 4**: **Lung Cancer-related and Lung Cancer and Heart Failure-related Mortality, Stratified by Overall, gender, and Urbanization in Adults in the United States 1999-2020** | | | | |
| --- | --- | --- | --- | --- |
| **Reporting Odds Ratio (95% CI)** | | | | |
| **Year** | **Female** | **Male** | **Metropolitan Area** | **Non-Metropolitan Area** |
| **15-24 Age Group** | | | | |
| **1999** | Suppressed | Suppressed | Suppressed | Suppressed |
| **2000** | Suppressed | Suppressed | Suppressed | Suppressed |
| **2001** | Suppressed | Suppressed | Suppressed | Suppressed |
| **2002** | Suppressed | Suppressed | Suppressed | Suppressed |
| **2003** | Suppressed | Suppressed | Suppressed | Suppressed |
| **2004** | Suppressed | Suppressed | Suppressed | Suppressed |
| **2005** | Suppressed | Suppressed | Suppressed | Suppressed |
| **2006** | Suppressed | Suppressed | Suppressed | Suppressed |
| **2007** | Suppressed | Suppressed | Suppressed | Suppressed |
| **2008** | Suppressed | Suppressed | Suppressed | Suppressed |
| **2009** | Suppressed | Suppressed | Suppressed | Suppressed |
| **2010** | Suppressed | Suppressed | Suppressed | Suppressed |
| **2011** | Suppressed | Suppressed | Suppressed | Suppressed |
| **2012** | Suppressed | Suppressed | Suppressed | Suppressed |
| **2013** | Suppressed | Suppressed | Suppressed | Suppressed |
| **2014** | Suppressed | Suppressed | Suppressed | Suppressed |
| **2015** | Suppressed | Suppressed | Suppressed | Suppressed |
| **2016** | Suppressed | Suppressed | Suppressed | Suppressed |
| **2017** | Suppressed | Suppressed | Suppressed | Suppressed |
| **2018** | Suppressed | Suppressed | Suppressed | Suppressed |
| **2019** | Suppressed | Suppressed | Suppressed | Suppressed |
| **2020** | Suppressed | Suppressed | Suppressed | Suppressed |
| **25-34 Age Group** | | | | |
| **1999** | Suppressed | Suppressed | 0.666 (0.422-1.051) | Suppressed |
| **2000** | Suppressed | Suppressed | 0.931 (0.631-1.373) | Suppressed |
| **2001** | Suppressed | Suppressed | 0.831 (0.513-1.348) | Suppressed |
| **2002** | Suppressed | Suppressed | 0.793 (0.501-1.255) | Suppressed |
| **2003** | Suppressed | Suppressed | 0.719 (0.439-1.178) | Suppressed |
| **2004** | Suppressed | Suppressed | 0.95 (0.614-1.469) | Suppressed |
| **2005** | Suppressed | Suppressed | 1.013 (0.634-1.619) | Suppressed |
| **2006** | Suppressed | Suppressed | 0.883 (0.572-1.362) | Suppressed |
| **2007** | Suppressed | Suppressed | 1.094 (0.698-1.716) | Suppressed |
| **2008** | Suppressed | Suppressed | 0.84 (0.535-1.32) | Suppressed |
| **2009** | Suppressed | Suppressed | 0.773 (0.483-1.239) | Suppressed |
| **2010** | Suppressed | Suppressed | 0.718 (0.449-1.149) | Suppressed |
| **2011** | Suppressed | Suppressed | 1.191 (0.77-1.843) | Suppressed |
| **2012** | Suppressed | Suppressed | 0.827 (0.537-1.273) | Suppressed |
| **2013** | Suppressed | Suppressed | 0.617 (0.347-1.098) | Suppressed |
| **2014** | Suppressed | Suppressed | 0.973 (0.617-1.536) | Suppressed |
| **2015** | Suppressed | Suppressed | 1.169 (0.764-1.787) | Suppressed |
| **2016** | Suppressed | Suppressed | 1.034 (0.65-1.645) | Suppressed |
| **2017** | Suppressed | Suppressed | 0.941 (0.563-1.573) | Suppressed |
| **2018** | Suppressed | Suppressed | 0.986 (0.613-1.587) | Suppressed |
| **2019** | Suppressed | Suppressed | 1.03 (0.631-1.682) | Suppressed |
| **2020** | Suppressed | Suppressed | 1.229 (0.797-1.895) | Suppressed |
| **35-44 Age Group** | | | | |
| **1999** | 0.461 (0.396-0.536) | 0.43 (0.373-0.496) | 0.456 (0.408-0.511) | 0.385 (0.297-0.499) |
| **2000** | 0.465 (0.398-0.544) | 0.451 (0.391-0.52) | 0.464 (0.412-0.521) | 0.435 (0.343-0.551) |
| **2001** | 0.457 (0.391-0.533) | 0.45 (0.389-0.52) | 0.442 (0.393-0.498) | 0.497 (0.394-0.628) |
| **2002** | 0.452 (0.388-0.527) | 0.388 (0.331-0.454) | 0.441 (0.391-0.498) | 0.331 (0.254-0.431) |
| **2003** | 0.407 (0.343-0.483) | 0.449 (0.387-0.522) | 0.438 (0.386-0.496) | 0.394 (0.305-0.51) |
| **2004** | 0.44 (0.373-0.518) | 0.43 (0.369-0.502) | 0.434 (0.383-0.492) | 0.427 (0.331-0.55) |
| **2005** | 0.467 (0.397-0.549) | 0.422 (0.359-0.496) | 0.45 (0.397-0.511) | 0.403 (0.309-0.526) |
| **2006** | 0.437 (0.366-0.521) | 0.42 (0.354-0.499) | 0.418 (0.364-0.48) | 0.46 (0.351-0.604) |
| **2007** | 0.476 (0.4-0.566) | 0.395 (0.328-0.477) | 0.449 (0.39-0.516) | 0.371 (0.275-0.502) |
| **2008** | 0.37 (0.298-0.458) | 0.403 (0.332-0.489) | 0.396 (0.337-0.465) | 0.347 (0.251-0.481) |
| **2009** | 0.443 (0.363-0.541) | 0.465 (0.385-0.561) | 0.451 (0.387-0.525) | 0.455 (0.333-0.622) |
| **2010** | 0.389 (0.312-0.485) | 0.45 (0.367-0.553) | 0.428 (0.362-0.506) | 0.376 (0.268-0.528) |
| **2011** | 0.505 (0.411-0.619) | 0.431 (0.349-0.533) | 0.492 (0.419-0.578) | 0.347 (0.238-0.504) |
| **2012** | 0.424 (0.338-0.532) | 0.461 (0.371-0.571) | 0.473 (0.399-0.56) | 0.308 (0.205-0.463) |
| **2013** | 0.474 (0.381-0.589) | 0.481 (0.389-0.596) | 0.466 (0.393-0.552) | 0.516 (0.363-0.734) |
| **2014** | 0.514 (0.412-0.64) | 0.507 (0.413-0.622) | 0.497 (0.42-0.588) | 0.551 (0.396-0.766) |
| **2015** | 0.532 (0.425-0.666) | 0.511 (0.41-0.637) | 0.551 (0.464-0.655) | 0.397 (0.269-0.586) |
| **2016** | 0.645 (0.513-0.811) | 0.525 (0.416-0.661) | 0.615 (0.515-0.733) | 0.441 (0.291-0.667) |
| **2017** | 0.558 (0.434-0.718) | 0.581 (0.463-0.729) | 0.612 (0.509-0.737) | 0.419 (0.279-0.629) |
| **2018** | 0.58 (0.454-0.74) | 0.585 (0.459-0.744) | 0.631 (0.524-0.76) | 0.404 (0.261-0.626) |
| **2019** | 0.659 (0.518-0.837) | 0.662 (0.53-0.828) | 0.664 (0.554-0.797) | 0.655 (0.451-0.952) |
| **2020** | 0.623 (0.487-0.798) | 0.662 (0.53-0.826) | 0.659 (0.549-0.79) | 0.599 (0.406-0.883) |
| **45-54 Age Group** | | | | |
| **1999** | 0.404 (0.374-0.437) | 0.365 (0.343-0.388) | 0.383 (0.363-0.404) | 0.354 (0.316-0.397) |
| **2000** | 0.388 (0.359-0.419) | 0.367 (0.345-0.39) | 0.376 (0.356-0.397) | 0.362 (0.323-0.405) |
| **2001** | 0.425 (0.395-0.458) | 0.389 (0.367-0.413) | 0.409 (0.388-0.431) | 0.367 (0.329-0.41) |
| **2002** | 0.412 (0.383-0.444) | 0.376 (0.354-0.4) | 0.396 (0.376-0.418) | 0.353 (0.316-0.395) |
| **2003** | 0.397 (0.368-0.428) | 0.371 (0.35-0.395) | 0.377 (0.357-0.397) | 0.387 (0.349-0.43) |
| **2004** | 0.407 (0.378-0.438) | 0.366 (0.345-0.389) | 0.387 (0.367-0.408) | 0.35 (0.313-0.391) |
| **2005** | 0.384 (0.356-0.414) | 0.377 (0.355-0.4) | 0.375 (0.355-0.395) | 0.385 (0.348-0.427) |
| **2006** | 0.395 (0.367-0.425) | 0.385 (0.362-0.409) | 0.388 (0.369-0.409) | 0.376 (0.338-0.418) |
| **2007** | 0.405 (0.377-0.435) | 0.368 (0.346-0.392) | 0.388 (0.368-0.409) | 0.348 (0.312-0.387) |
| **2008** | 0.428 (0.399-0.459) | 0.39 (0.367-0.414) | 0.401 (0.38-0.422) | 0.408 (0.369-0.451) |
| **2009** | 0.44 (0.41-0.471) | 0.381 (0.358-0.405) | 0.405 (0.385-0.427) | 0.388 (0.351-0.429) |
| **2010** | 0.431 (0.402-0.462) | 0.368 (0.345-0.392) | 0.394 (0.373-0.415) | 0.377 (0.34-0.418) |
| **2011** | 0.429 (0.399-0.461) | 0.381 (0.357-0.406) | 0.406 (0.385-0.428) | 0.363 (0.327-0.404) |
| **2012** | 0.427 (0.397-0.46) | 0.396 (0.372-0.423) | 0.405 (0.384-0.428) | 0.404 (0.364-0.449) |
| **2013** | 0.438 (0.407-0.471) | 0.385 (0.36-0.412) | 0.402 (0.38-0.425) | 0.407 (0.365-0.452) |
| **2014** | 0.437 (0.405-0.471) | 0.385 (0.359-0.413) | 0.41 (0.387-0.434) | 0.377 (0.336-0.422) |
| **2015** | 0.441 (0.408-0.477) | 0.404 (0.376-0.434) | 0.427 (0.402-0.453) | 0.378 (0.337-0.424) |
| **2016** | 0.46 (0.425-0.499) | 0.419 (0.389-0.452) | 0.433 (0.407-0.46) | 0.428 (0.381-0.48) |
| **2017** | 0.476 (0.437-0.517) | 0.453 (0.419-0.489) | 0.464 (0.436-0.495) | 0.433 (0.383-0.488) |
| **2018** | 0.505 (0.463-0.55) | 0.453 (0.418-0.49) | 0.471 (0.441-0.503) | 0.468 (0.413-0.53) |
| **2019** | 0.504 (0.46-0.551) | 0.462 (0.424-0.503) | 0.471 (0.439-0.505) | 0.483 (0.424-0.549) |
| **2020** | 0.511 (0.467-0.56) | 0.487 (0.447-0.531) | 0.485 (0.451-0.521) | 0.515 (0.453-0.585) |
| **55-64 Age Group** | | | | |
| **1999** | 0.405 (0.387-0.424) | 0.383 (0.369-0.397) | 0.392 (0.38-0.404) | 0.389 (0.366-0.414) |
| **2000** | 0.396 (0.378-0.415) | 0.385 (0.372-0.399) | 0.395 (0.382-0.407) | 0.372 (0.349-0.396) |
| **2001** | 0.405 (0.387-0.424) | 0.401 (0.387-0.416) | 0.404 (0.392-0.417) | 0.397 (0.373-0.422) |
| **2002** | 0.414 (0.396-0.432) | 0.38 (0.367-0.394) | 0.39 (0.378-0.402) | 0.403 (0.38-0.428) |
| **2003** | 0.395 (0.378-0.413) | 0.387 (0.373-0.401) | 0.389 (0.377-0.401) | 0.393 (0.369-0.417) |
| **2004** | 0.426 (0.408-0.445) | 0.399 (0.385-0.413) | 0.411 (0.399-0.424) | 0.4 (0.377-0.425) |
| **2005** | 0.412 (0.395-0.431) | 0.406 (0.392-0.42) | 0.408 (0.396-0.421) | 0.408 (0.384-0.433) |
| **2006** | 0.43 (0.412-0.449) | 0.404 (0.39-0.418) | 0.413 (0.401-0.426) | 0.414 (0.39-0.439) |
| **2007** | 0.421 (0.403-0.44) | 0.411 (0.396-0.425) | 0.413 (0.401-0.426) | 0.413 (0.39-0.439) |
| **2008** | 0.43 (0.412-0.45) | 0.41 (0.396-0.425) | 0.419 (0.406-0.432) | 0.412 (0.388-0.437) |
| **2009** | 0.423 (0.404-0.442) | 0.421 (0.407-0.436) | 0.419 (0.406-0.432) | 0.429 (0.404-0.455) |
| **2010** | 0.427 (0.409-0.446) | 0.429 (0.415-0.444) | 0.429 (0.416-0.442) | 0.421 (0.397-0.447) |
| **2011** | 0.444 (0.425-0.463) | 0.421 (0.407-0.436) | 0.431 (0.418-0.444) | 0.42 (0.396-0.445) |
| **2012** | 0.449 (0.431-0.469) | 0.417 (0.403-0.432) | 0.436 (0.423-0.45) | 0.397 (0.374-0.421) |
| **2013** | 0.448 (0.43-0.468) | 0.435 (0.421-0.45) | 0.439 (0.426-0.452) | 0.438 (0.413-0.464) |
| **2014** | 0.431 (0.413-0.45) | 0.43 (0.416-0.445) | 0.43 (0.417-0.443) | 0.424 (0.4-0.449) |
| **2015** | 0.441 (0.423-0.46) | 0.431 (0.416-0.446) | 0.434 (0.421-0.447) | 0.431 (0.407-0.456) |
| **2016** | 0.455 (0.437-0.474) | 0.445 (0.43-0.461) | 0.45 (0.437-0.464) | 0.433 (0.409-0.458) |
| **2017** | 0.474 (0.455-0.494) | 0.455 (0.439-0.471) | 0.462 (0.449-0.476) | 0.449 (0.425-0.476) |
| **2018** | 0.47 (0.451-0.489) | 0.462 (0.447-0.478) | 0.46 (0.447-0.474) | 0.466 (0.44-0.493) |
| **2019** | 0.475 (0.455-0.495) | 0.482 (0.465-0.499) | 0.474 (0.46-0.489) | 0.478 (0.452-0.506) |
| **2020** | 0.51 (0.49-0.531) | 0.496 (0.479-0.513) | 0.496 (0.481-0.511) | 0.503 (0.477-0.531) |
| **65-74 Age Group** | | | | |
| **1999** | 0.419 (0.406-0.432) | 0.441 (0.43-0.452) | 0.434 (0.424-0.443) | 0.432 (0.414-0.452) |
| **2000** | 0.402 (0.39-0.415) | 0.433 (0.423-0.444) | 0.424 (0.414-0.433) | 0.417 (0.4-0.436) |
| **2001** | 0.421 (0.408-0.434) | 0.446 (0.436-0.458) | 0.437 (0.427-0.446) | 0.441 (0.422-0.46) |
| **2002** | 0.432 (0.419-0.446) | 0.449 (0.438-0.46) | 0.444 (0.434-0.454) | 0.44 (0.421-0.459) |
| **2003** | 0.422 (0.409-0.436) | 0.452 (0.44-0.463) | 0.442 (0.433-0.452) | 0.435 (0.416-0.454) |
| **2004** | 0.443 (0.429-0.457) | 0.452 (0.441-0.464) | 0.448 (0.438-0.459) | 0.452 (0.433-0.472) |
| **2005** | 0.431 (0.418-0.446) | 0.461 (0.449-0.473) | 0.449 (0.439-0.459) | 0.454 (0.435-0.474) |
| **2006** | 0.455 (0.44-0.469) | 0.466 (0.454-0.478) | 0.461 (0.451-0.472) | 0.464 (0.444-0.485) |
| **2007** | 0.461 (0.447-0.476) | 0.473 (0.461-0.485) | 0.471 (0.46-0.482) | 0.461 (0.442-0.482) |
| **2008** | 0.463 (0.448-0.477) | 0.474 (0.462-0.486) | 0.467 (0.456-0.478) | 0.48 (0.46-0.5) |
| **2009** | 0.452 (0.438-0.467) | 0.475 (0.463-0.487) | 0.466 (0.455-0.477) | 0.466 (0.446-0.486) |
| **2010** | 0.461 (0.447-0.476) | 0.476 (0.464-0.489) | 0.472 (0.461-0.482) | 0.465 (0.446-0.486) |
| **2011** | 0.469 (0.455-0.484) | 0.471 (0.459-0.484) | 0.471 (0.46-0.482) | 0.47 (0.451-0.491) |
| **2012** | 0.468 (0.454-0.483) | 0.481 (0.469-0.494) | 0.478 (0.467-0.489) | 0.47 (0.45-0.49) |
| **2013** | 0.47 (0.456-0.485) | 0.482 (0.47-0.495) | 0.478 (0.467-0.488) | 0.474 (0.454-0.494) |
| **2014** | 0.459 (0.445-0.473) | 0.48 (0.468-0.493) | 0.468 (0.458-0.479) | 0.483 (0.464-0.504) |
| **2015** | 0.464 (0.45-0.479) | 0.481 (0.469-0.494) | 0.474 (0.464-0.485) | 0.474 (0.454-0.494) |
| **2016** | 0.482 (0.467-0.497) | 0.489 (0.477-0.502) | 0.484 (0.474-0.495) | 0.493 (0.473-0.514) |
| **2017** | 0.482 (0.467-0.496) | 0.514 (0.501-0.527) | 0.499 (0.488-0.51) | 0.503 (0.482-0.524) |
| **2018** | 0.497 (0.482-0.512) | 0.513 (0.5-0.526) | 0.504 (0.493-0.515) | 0.51 (0.489-0.532) |
| **2019** | 0.494 (0.479-0.51) | 0.526 (0.513-0.54) | 0.51 (0.498-0.521) | 0.521 (0.5-0.543) |
| **2020** | 0.538 (0.523-0.554) | 0.561 (0.547-0.575) | 0.546 (0.534-0.557) | 0.568 (0.546-0.591) |
| **75-84 Age Group** | | | | |
| **1999** | 0.42 (0.408-0.433) | 0.469 (0.458-0.481) | 0.453 (0.443-0.463) | 0.426 (0.408-0.446) |
| **2000** | 0.434 (0.421-0.446) | 0.472 (0.46-0.483) | 0.457 (0.448-0.467) | 0.445 (0.426-0.465) |
| **2001** | 0.429 (0.417-0.442) | 0.461 (0.449-0.472) | 0.45 (0.441-0.459) | 0.434 (0.415-0.453) |
| **2002** | 0.438 (0.426-0.451) | 0.47 (0.458-0.482) | 0.454 (0.445-0.463) | 0.465 (0.446-0.485) |
| **2003** | 0.438 (0.426-0.451) | 0.474 (0.463-0.486) | 0.459 (0.45-0.469) | 0.455 (0.436-0.474) |
| **2004** | 0.439 (0.427-0.452) | 0.473 (0.461-0.484) | 0.457 (0.447-0.466) | 0.464 (0.445-0.484) |
| **2005** | 0.445 (0.432-0.458) | 0.481 (0.469-0.493) | 0.463 (0.453-0.472) | 0.474 (0.454-0.494) |
| **2006** | 0.45 (0.437-0.463) | 0.488 (0.476-0.5) | 0.47 (0.46-0.48) | 0.477 (0.458-0.498) |
| **2007** | 0.448 (0.435-0.46) | 0.496 (0.484-0.508) | 0.473 (0.464-0.483) | 0.479 (0.46-0.5) |
| **2008** | 0.455 (0.442-0.468) | 0.49 (0.478-0.503) | 0.473 (0.463-0.483) | 0.481 (0.461-0.502) |
| **2009** | 0.457 (0.444-0.47) | 0.511 (0.499-0.524) | 0.486 (0.476-0.496) | 0.494 (0.474-0.516) |
| **2010** | 0.475 (0.461-0.488) | 0.511 (0.498-0.524) | 0.497 (0.486-0.507) | 0.489 (0.469-0.511) |
| **2011** | 0.474 (0.461-0.488) | 0.515 (0.502-0.529) | 0.501 (0.49-0.512) | 0.483 (0.463-0.505) |
| **2012** | 0.48 (0.466-0.494) | 0.506 (0.493-0.519) | 0.494 (0.483-0.505) | 0.498 (0.477-0.52) |
| **2013** | 0.483 (0.469-0.497) | 0.513 (0.5-0.526) | 0.503 (0.492-0.514) | 0.487 (0.466-0.508) |
| **2014** | 0.468 (0.454-0.482) | 0.507 (0.494-0.521) | 0.49 (0.48-0.501) | 0.488 (0.467-0.51) |
| **2015** | 0.477 (0.463-0.491) | 0.505 (0.492-0.519) | 0.493 (0.482-0.504) | 0.493 (0.472-0.516) |
| **2016** | 0.487 (0.473-0.502) | 0.524 (0.51-0.538) | 0.508 (0.497-0.52) | 0.506 (0.484-0.529) |
| **2017** | 0.499 (0.485-0.514) | 0.534 (0.52-0.548) | 0.517 (0.506-0.529) | 0.525 (0.503-0.549) |
| **2018** | 0.508 (0.494-0.523) | 0.545 (0.531-0.56) | 0.522 (0.51-0.533) | 0.554 (0.531-0.578) |
| **2019** | 0.527 (0.512-0.542) | 0.558 (0.544-0.572) | 0.542 (0.531-0.554) | 0.552 (0.529-0.576) |
| **2020** | 0.552 (0.537-0.568) | 0.59 (0.575-0.605) | 0.571 (0.559-0.583) | 0.58 (0.557-0.605) |
| **85+ Age Group** | | | | |
| **1999** | 0.457 (0.435-0.479) | 0.481 (0.458-0.504) | 0.467 (0.45-0.485) | 0.453 (0.418-0.49) |
| **2000** | 0.446 (0.425-0.468) | 0.469 (0.447-0.492) | 0.455 (0.438-0.472) | 0.45 (0.416-0.487) |
| **2001** | 0.457 (0.436-0.478) | 0.483 (0.461-0.506) | 0.468 (0.451-0.485) | 0.456 (0.423-0.493) |
| **2002** | 0.463 (0.442-0.485) | 0.492 (0.47-0.515) | 0.472 (0.455-0.489) | 0.485 (0.451-0.523) |
| **2003** | 0.46 (0.439-0.481) | 0.487 (0.465-0.509) | 0.472 (0.456-0.489) | 0.463 (0.429-0.499) |
| **2004** | 0.466 (0.446-0.487) | 0.493 (0.471-0.516) | 0.473 (0.457-0.49) | 0.496 (0.461-0.534) |
| **2005** | 0.475 (0.455-0.496) | 0.481 (0.46-0.503) | 0.478 (0.462-0.495) | 0.467 (0.434-0.503) |
| **2006** | 0.485 (0.464-0.505) | 0.491 (0.47-0.512) | 0.484 (0.468-0.501) | 0.495 (0.461-0.531) |
| **2007** | 0.467 (0.448-0.487) | 0.482 (0.462-0.503) | 0.477 (0.462-0.494) | 0.454 (0.422-0.488) |
| **2008** | 0.467 (0.448-0.487) | 0.501 (0.48-0.522) | 0.487 (0.471-0.503) | 0.466 (0.434-0.5) |
| **2009** | 0.473 (0.454-0.492) | 0.512 (0.491-0.533) | 0.491 (0.475-0.507) | 0.493 (0.46-0.528) |
| **2010** | 0.484 (0.465-0.503) | 0.497 (0.477-0.518) | 0.492 (0.477-0.508) | 0.48 (0.448-0.514) |
| **2011** | 0.496 (0.477-0.516) | 0.509 (0.488-0.53) | 0.501 (0.486-0.517) | 0.508 (0.474-0.544) |
| **2012** | 0.489 (0.47-0.508) | 0.507 (0.487-0.528) | 0.502 (0.486-0.517) | 0.482 (0.449-0.516) |
| **2013** | 0.488 (0.469-0.508) | 0.496 (0.477-0.517) | 0.498 (0.483-0.514) | 0.465 (0.434-0.499) |
| **2014** | 0.478 (0.46-0.498) | 0.504 (0.484-0.524) | 0.492 (0.477-0.508) | 0.486 (0.453-0.521) |
| **2015** | 0.475 (0.457-0.493) | 0.506 (0.486-0.526) | 0.49 (0.475-0.505) | 0.494 (0.462-0.528) |
| **2016** | 0.483 (0.465-0.502) | 0.503 (0.483-0.523) | 0.489 (0.475-0.505) | 0.512 (0.479-0.547) |
| **2017** | 0.491 (0.472-0.51) | 0.523 (0.503-0.544) | 0.506 (0.491-0.521) | 0.515 (0.481-0.551) |
| **2018** | 0.508 (0.488-0.528) | 0.54 (0.52-0.562) | 0.52 (0.505-0.536) | 0.545 (0.509-0.582) |
| **2019** | 0.509 (0.49-0.529) | 0.558 (0.537-0.58) | 0.531 (0.515-0.547) | 0.548 (0.513-0.586) |
| **2020** | 0.563 (0.542-0.585) | 0.585 (0.563-0.609) | 0.57 (0.554-0.588) | 0.597 (0.559-0.637) |

| **Supplementary Table 5: Lung Cancer-related Age-Adjusted Mortality Rates per 100,000, Stratified by Region in Adults in the United States 1999-2020** | | | | | |
| --- | --- | --- | --- | --- | --- |
| **Reporting Odds Ratio (95% CI)** | | | | | |
| **Year** | **Northeast** | **Midwest** | **South** | **West** | |
| **15-24 Age Group** | | | | | |
| **1999** | Suppressed | Suppressed | Suppressed | Suppressed | |
| **2000** | Suppressed | Suppressed | Suppressed | Suppressed | |
| **2001** | Suppressed | Suppressed | Suppressed | Suppressed | |
| **2002** | Suppressed | Suppressed | Suppressed | Suppressed | |
| **2003** | Suppressed | Suppressed | Suppressed | Suppressed | |
| **2004** | Suppressed | Suppressed | Suppressed | Suppressed | |
| **2005** | Suppressed | Suppressed | Suppressed | Suppressed | |
| **2006** | Suppressed | Suppressed | Suppressed | Suppressed | |
| **2007** | Suppressed | Suppressed | Suppressed | Suppressed | |
| **2008** | Suppressed | Suppressed | Suppressed | Suppressed | |
| **2009** | Suppressed | Suppressed | Suppressed | Suppressed | |
| **2010** | Suppressed | Suppressed | Suppressed | Suppressed | |
| **2011** | Suppressed | Suppressed | Suppressed | Suppressed | |
| **2012** | Suppressed | Suppressed | Suppressed | Suppressed | |
| **2013** | Suppressed | Suppressed | Suppressed | Suppressed | |
| **2014** | Suppressed | Suppressed | Suppressed | Suppressed | |
| **2015** | Suppressed | Suppressed | Suppressed | Suppressed | |
| **2016** | Suppressed | Suppressed | Suppressed | Suppressed | |
| **2017** | Suppressed | Suppressed | Suppressed | Suppressed | |
| **2018** | Suppressed | Suppressed | Suppressed | Suppressed | |
| **2019** | Suppressed | Suppressed | Suppressed | Suppressed | |
| **2020** | Suppressed | Suppressed | Suppressed | Suppressed | |
| **25-34 Age Group** | | | | | |
| **1999** | Suppressed | Suppressed | Suppressed | Suppressed | |
| **2000** | Suppressed | Suppressed | Suppressed | Suppressed | |
| **2001** | Suppressed | Suppressed | Suppressed | Suppressed | |
| **2002** | Suppressed | Suppressed | Suppressed | Suppressed | |
| **2003** | Suppressed | Suppressed | Suppressed | Suppressed | |
| **2004** | Suppressed | Suppressed | Suppressed | Suppressed | |
| **2005** | Suppressed | Suppressed | Suppressed | Suppressed | |
| **2006** | Suppressed | Suppressed | Suppressed | Suppressed | |
| **2007** | Suppressed | Suppressed | Suppressed | Suppressed | |
| **2008** | Suppressed | Suppressed | Suppressed | Suppressed | |
| **2009** | Suppressed | Suppressed | Suppressed | Suppressed | |
| **2010** | Suppressed | Suppressed | Suppressed | Suppressed | |
| **2011** | Suppressed | Suppressed | Suppressed | Suppressed | |
| **2012** | Suppressed | Suppressed | Suppressed | Suppressed | |
| **2013** | Suppressed | Suppressed | Suppressed | Suppressed | |
| **2014** | Suppressed | Suppressed | Suppressed | Suppressed | |
| **2015** | Suppressed | Suppressed | Suppressed | Suppressed | |
| **2016** | Suppressed | Suppressed | Suppressed | Suppressed | |
| **2017** | Suppressed | Suppressed | Suppressed | Suppressed | |
| **2018** | Suppressed | Suppressed | Suppressed | Suppressed | |
| **2019** | Suppressed | Suppressed | Suppressed | Suppressed | |
| **2020** | Suppressed | Suppressed | Suppressed | Suppressed | |
| **35-44 Age Group** | | | | | |
| **1999** | 0.603 (0.496-0.733) | 0.293 (0.226-0.379) | 0.405 (0.342-0.479) | 0.543 (0.42-0.701) | |
| **2000** | 0.683 (0.559-0.834) | 0.305 (0.236-0.393) | 0.411 (0.347-0.486) | 0.542 (0.414-0.71) | |
| **2001** | 0.556 (0.448-0.689) | 0.32 (0.248-0.412) | 0.426 (0.361-0.503) | 0.613 (0.474-0.793) | |
| **2002** | 0.591 (0.473-0.738) | 0.31 (0.242-0.396) | 0.385 (0.323-0.459) | 0.493 (0.373-0.651) | |
| **2003** | 0.603 (0.487-0.747) | 0.323 (0.248-0.42) | 0.374 (0.311-0.449) | 0.518 (0.389-0.69) | |
| **2004** | 0.642 (0.518-0.796) | 0.303 (0.232-0.396) | 0.358 (0.298-0.431) | 0.59 (0.449-0.775) | |
| **2005** | 0.639 (0.512-0.796) | 0.356 (0.276-0.459) | 0.377 (0.313-0.454) | 0.508 (0.377-0.684) | |
| **2006** | 0.605 (0.479-0.764) | 0.236 (0.169-0.328) | 0.418 (0.347-0.505) | 0.514 (0.371-0.711) | |
| **2007** | 0.551 (0.426-0.712) | 0.385 (0.293-0.507) | 0.389 (0.318-0.477) | 0.474 (0.34-0.663) | |
| **2008** | 0.565 (0.423-0.755) | 0.271 (0.192-0.384) | 0.304 (0.239-0.386) | 0.615 (0.447-0.845) | |
| **2009** | 0.611 (0.47-0.794) | 0.328 (0.239-0.452) | 0.388 (0.309-0.486) | 0.626 (0.448-0.875) | |
| **2010** | 0.608 (0.451-0.82) | 0.292 (0.203-0.42) | 0.37 (0.29-0.472) | 0.505 (0.357-0.714) | |
| **2011** | 0.562 (0.416-0.761) | 0.343 (0.242-0.488) | 0.422 (0.332-0.536) | 0.621 (0.446-0.865) | |
| **2012** | 0.678 (0.502-0.916) | 0.318 (0.221-0.458) | 0.362 (0.278-0.472) | 0.564 (0.394-0.807) | |
| **2013** | 0.608 (0.443-0.835) | 0.386 (0.274-0.545) | 0.417 (0.325-0.534) | 0.612 (0.43-0.869) | |
| **2014** | 0.648 (0.467-0.9) | 0.48 (0.344-0.668) | 0.427 (0.336-0.543) | 0.629 (0.446-0.886) | |
| **2015** | 0.776 (0.551-1.093) | 0.47 (0.338-0.654) | 0.434 (0.336-0.559) | 0.618 (0.424-0.9) | |
| **2016** | 0.673 (0.46-0.985) | 0.41 (0.273-0.618) | 0.567 (0.447-0.72) | 0.79 (0.543-1.149) | |
| **2017** | 0.721 (0.482-1.077) | 0.529 (0.366-0.765) | 0.498 (0.383-0.649) | 0.709 (0.487-1.033) | |
| **2018** | 0.841 (0.577-1.225) | 0.447 (0.296-0.674) | 0.507 (0.39-0.659) | 0.8 (0.538-1.191) | |
| **2019** | 0.66 (0.429-1.014) | 0.635 (0.441-0.913) | 0.627 (0.493-0.797) | 0.822 (0.565-1.197) | |
| **2020** | 0.646 (0.428-0.977) | 0.626 (0.428-0.916) | 0.607 (0.473-0.778) | 0.789 (0.551-1.13) | |
| **45-54 Age Group** | | | | | |
| **1999** | 0.522 (0.475-0.574) | 0.274 (0.244-0.308) | 0.327 (0.302-0.354) | 0.472 (0.422-0.527) | |
| **2000** | 0.459 (0.416-0.507) | 0.303 (0.271-0.338) | 0.342 (0.317-0.37) | 0.452 (0.402-0.507) | |
| **2001** | 0.571 (0.522-0.626) | 0.316 (0.283-0.352) | 0.333 (0.308-0.36) | 0.492 (0.44-0.55) | |
| **2002** | 0.558 (0.508-0.612) | 0.292 (0.261-0.326) | 0.34 (0.315-0.367) | 0.455 (0.406-0.509) | |
| **2003** | 0.507 (0.461-0.558) | 0.279 (0.249-0.311) | 0.358 (0.333-0.386) | 0.431 (0.383-0.484) | |
| **2004** | 0.548 (0.499-0.602) | 0.283 (0.254-0.316) | 0.33 (0.306-0.356) | 0.462 (0.413-0.518) | |
| **2005** | 0.496 (0.45-0.547) | 0.3 (0.27-0.334) | 0.343 (0.319-0.37) | 0.447 (0.399-0.502) | |
| **2006** | 0.487 (0.442-0.537) | 0.318 (0.286-0.353) | 0.355 (0.33-0.382) | 0.456 (0.406-0.511) | |
| **2007** | 0.523 (0.476-0.576) | 0.271 (0.243-0.303) | 0.347 (0.322-0.374) | 0.467 (0.417-0.522) | |
| **2008** | 0.561 (0.509-0.617) | 0.304 (0.274-0.337) | 0.371 (0.345-0.398) | 0.472 (0.422-0.528) | |
| **2009** | 0.509 (0.461-0.561) | 0.315 (0.284-0.349) | 0.377 (0.351-0.405) | 0.497 (0.444-0.556) | |
| **2010** | 0.522 (0.472-0.576) | 0.311 (0.28-0.346) | 0.36 (0.335-0.388) | 0.46 (0.408-0.518) | |
| **2011** | 0.55 (0.497-0.608) | 0.285 (0.254-0.319) | 0.369 (0.343-0.398) | 0.489 (0.435-0.55) | |
| **2012** | 0.497 (0.447-0.553) | 0.332 (0.298-0.37) | 0.378 (0.351-0.407) | 0.513 (0.455-0.579) | |
| **2013** | 0.527 (0.474-0.587) | 0.33 (0.296-0.368) | 0.368 (0.34-0.397) | 0.507 (0.448-0.574) | |
| **2014** | 0.526 (0.47-0.588) | 0.329 (0.294-0.368) | 0.353 (0.326-0.383) | 0.558 (0.494-0.631) | |
| **2015** | 0.535 (0.476-0.6) | 0.357 (0.319-0.399) | 0.385 (0.355-0.418) | 0.487 (0.425-0.558) | |
| **2016** | 0.551 (0.488-0.622) | 0.335 (0.296-0.38) | 0.406 (0.374-0.441) | 0.568 (0.496-0.651) | |
| **2017** | 0.56 (0.492-0.637) | 0.38 (0.336-0.429) | 0.416 (0.381-0.454) | 0.628 (0.55-0.718) | |
| **2018** | 0.558 (0.488-0.637) | 0.452 (0.401-0.51) | 0.428 (0.391-0.469) | 0.552 (0.476-0.64) | |
| **2019** | 0.598 (0.52-0.688) | 0.386 (0.337-0.443) | 0.443 (0.403-0.486) | 0.619 (0.53-0.723) | |
| **2020** | 0.608 (0.526-0.704) | 0.453 (0.396-0.517) | 0.46 (0.419-0.506) | 0.559 (0.475-0.658) | |
| **55-64 Age Group** | | | | | |
| **1999** | 0.5 (0.472-0.53) | 0.342 (0.321-0.363) | 0.352 (0.336-0.369) | 0.429 (0.402-0.459) | |
| **2000** | 0.479 (0.452-0.509) | 0.35 (0.329-0.372) | 0.344 (0.329-0.36) | 0.452 (0.424-0.483) | |
| **2001** | 0.498 (0.469-0.528) | 0.348 (0.327-0.37) | 0.364 (0.348-0.381) | 0.467 (0.438-0.498) | |
| **2002** | 0.488 (0.461-0.518) | 0.354 (0.333-0.377) | 0.353 (0.338-0.369) | 0.431 (0.404-0.461) | |
| **2003** | 0.501 (0.473-0.531) | 0.338 (0.318-0.36) | 0.353 (0.338-0.37) | 0.424 (0.397-0.453) | |
| **2004** | 0.508 (0.479-0.538) | 0.353 (0.332-0.375) | 0.38 (0.364-0.397) | 0.448 (0.42-0.479) | |
| **2005** | 0.511 (0.482-0.542) | 0.358 (0.337-0.38) | 0.369 (0.353-0.385) | 0.466 (0.437-0.497) | |
| **2006** | 0.514 (0.485-0.544) | 0.364 (0.343-0.387) | 0.38 (0.364-0.397) | 0.453 (0.424-0.483) | |
| **2007** | 0.505 (0.477-0.535) | 0.36 (0.338-0.382) | 0.379 (0.363-0.396) | 0.47 (0.441-0.501) | |
| **2008** | 0.515 (0.485-0.546) | 0.372 (0.35-0.395) | 0.376 (0.36-0.393) | 0.479 (0.449-0.511) | |
| **2009** | 0.519 (0.489-0.551) | 0.357 (0.336-0.38) | 0.392 (0.376-0.409) | 0.486 (0.456-0.518) | |
| **2010** | 0.52 (0.49-0.552) | 0.367 (0.345-0.389) | 0.396 (0.379-0.413) | 0.497 (0.467-0.53) | |
| **2011** | 0.52 (0.491-0.552) | 0.376 (0.354-0.398) | 0.393 (0.376-0.41) | 0.503 (0.472-0.535) | |
| **2012** | 0.5 (0.471-0.531) | 0.375 (0.354-0.398) | 0.399 (0.382-0.416) | 0.513 (0.482-0.546) | |
| **2013** | 0.519 (0.489-0.551) | 0.37 (0.349-0.393) | 0.417 (0.4-0.434) | 0.521 (0.489-0.555) | |
| **2014** | 0.493 (0.464-0.525) | 0.364 (0.344-0.386) | 0.409 (0.392-0.426) | 0.523 (0.491-0.557) | |
| **2015** | 0.517 (0.487-0.549) | 0.38 (0.359-0.402) | 0.41 (0.394-0.427) | 0.499 (0.468-0.531) | |
| **2016** | 0.528 (0.496-0.561) | 0.379 (0.358-0.401) | 0.428 (0.411-0.446) | 0.529 (0.496-0.564) | |
| **2017** | 0.518 (0.487-0.551) | 0.408 (0.386-0.432) | 0.447 (0.429-0.465) | 0.527 (0.494-0.562) | |
| **2018** | 0.517 (0.486-0.551) | 0.407 (0.385-0.431) | 0.452 (0.434-0.471) | 0.53 (0.497-0.566) | |
| **2019** | 0.518 (0.486-0.553) | 0.428 (0.405-0.453) | 0.464 (0.446-0.483) | 0.553 (0.518-0.59) | |
| **2020** | 0.519 (0.487-0.554) | 0.451 (0.427-0.477) | 0.496 (0.477-0.516) | 0.569 (0.534-0.607) | |
| **65-74 Age Group** | | | | | |
| **1999** | 0.506 (0.486-0.527) | 0.409 (0.392-0.426) | 0.397 (0.384-0.41) | 0.464 (0.443-0.485) | |
| **2000** | 0.503 (0.483-0.524) | 0.388 (0.372-0.404) | 0.383 (0.371-0.395) | 0.466 (0.445-0.487) | |
| **2001** | 0.52 (0.498-0.542) | 0.404 (0.388-0.421) | 0.403 (0.39-0.416) | 0.473 (0.452-0.495) | |
| **2002** | 0.53 (0.508-0.552) | 0.403 (0.387-0.421) | 0.409 (0.396-0.423) | 0.476 (0.455-0.498) | |
| **2003** | 0.519 (0.497-0.542) | 0.414 (0.397-0.432) | 0.404 (0.391-0.417) | 0.475 (0.454-0.498) | |
| **2004** | 0.53 (0.507-0.554) | 0.418 (0.4-0.436) | 0.408 (0.395-0.422) | 0.501 (0.479-0.524) | |
| **2005** | 0.517 (0.495-0.541) | 0.428 (0.41-0.447) | 0.406 (0.392-0.419) | 0.512 (0.489-0.536) | |
| **2006** | 0.544 (0.521-0.569) | 0.43 (0.411-0.449) | 0.425 (0.412-0.44) | 0.503 (0.48-0.526) | |
| **2007** | 0.556 (0.532-0.581) | 0.448 (0.43-0.468) | 0.428 (0.414-0.442) | 0.503 (0.48-0.527) | |
| **2008** | 0.551 (0.527-0.576) | 0.438 (0.42-0.458) | 0.431 (0.417-0.445) | 0.521 (0.497-0.545) | |
| **2009** | 0.543 (0.519-0.568) | 0.422 (0.404-0.441) | 0.433 (0.42-0.447) | 0.522 (0.499-0.547) | |
| **2010** | 0.538 (0.515-0.563) | 0.427 (0.409-0.446) | 0.437 (0.423-0.452) | 0.536 (0.512-0.561) | |
| **2011** | 0.542 (0.517-0.567) | 0.433 (0.414-0.452) | 0.437 (0.423-0.451) | 0.534 (0.51-0.559) | |
| **2012** | 0.546 (0.522-0.571) | 0.424 (0.406-0.443) | 0.444 (0.43-0.459) | 0.55 (0.526-0.576) | |
| **2013** | 0.537 (0.513-0.561) | 0.438 (0.419-0.457) | 0.449 (0.435-0.463) | 0.538 (0.515-0.563) | |
| **2014** | 0.538 (0.514-0.563) | 0.433 (0.415-0.452) | 0.447 (0.433-0.461) | 0.521 (0.498-0.545) | |
| **2015** | 0.536 (0.512-0.561) | 0.434 (0.416-0.453) | 0.441 (0.428-0.455) | 0.546 (0.523-0.571) | |
| **2016** | 0.543 (0.519-0.569) | 0.429 (0.411-0.448) | 0.474 (0.459-0.488) | 0.54 (0.516-0.565) | |
| **2017** | 0.533 (0.509-0.558) | 0.452 (0.433-0.471) | 0.487 (0.472-0.502) | 0.567 (0.543-0.592) | |
| **2018** | 0.541 (0.517-0.567) | 0.46 (0.441-0.48) | 0.5 (0.486-0.516) | 0.551 (0.526-0.577) | |
| **2019** | 0.55 (0.525-0.577) | 0.472 (0.453-0.492) | 0.501 (0.486-0.516) | 0.566 (0.541-0.591) | |
| **2020** | 0.559 (0.534-0.586) | 0.5 (0.48-0.52) | 0.549 (0.534-0.565) | 0.623 (0.597-0.65) | |
| **75-84 Age Group** | | | | | |
| **1999** | 0.515 (0.495-0.535) | 0.412 (0.396-0.43) | 0.407 (0.394-0.421) | 0.496 (0.475-0.517) | |
| **2000** | 0.519 (0.5-0.54) | 0.419 (0.402-0.436) | 0.418 (0.405-0.432) | 0.495 (0.475-0.517) | |
| **2001** | 0.51 (0.49-0.53) | 0.409 (0.393-0.426) | 0.414 (0.401-0.427) | 0.485 (0.465-0.506) | |
| **2002** | 0.519 (0.499-0.539) | 0.419 (0.402-0.436) | 0.423 (0.41-0.436) | 0.495 (0.475-0.517) | |
| **2003** | 0.518 (0.499-0.539) | 0.437 (0.42-0.454) | 0.415 (0.402-0.428) | 0.502 (0.482-0.523) | |
| **2004** | 0.524 (0.504-0.544) | 0.429 (0.412-0.446) | 0.415 (0.402-0.429) | 0.505 (0.485-0.527) | |
| **2005** | 0.523 (0.503-0.544) | 0.446 (0.429-0.464) | 0.427 (0.414-0.441) | 0.498 (0.478-0.519) | |
| **2006** | 0.543 (0.522-0.565) | 0.445 (0.428-0.463) | 0.432 (0.418-0.446) | 0.504 (0.483-0.525) | |
| **2007** | 0.535 (0.514-0.556) | 0.451 (0.433-0.469) | 0.437 (0.423-0.451) | 0.508 (0.487-0.53) | |
| **2008** | 0.524 (0.504-0.545) | 0.445 (0.428-0.463) | 0.443 (0.429-0.457) | 0.519 (0.497-0.541) | |
| **2009** | 0.554 (0.532-0.577) | 0.449 (0.432-0.468) | 0.45 (0.436-0.465) | 0.534 (0.512-0.557) | |
| **2010** | 0.556 (0.534-0.579) | 0.451 (0.433-0.47) | 0.456 (0.441-0.47) | 0.56 (0.537-0.583) | |
| **2011** | 0.556 (0.534-0.58) | 0.464 (0.446-0.484) | 0.455 (0.44-0.47) | 0.558 (0.535-0.582) | |
| **2012** | 0.544 (0.522-0.568) | 0.462 (0.444-0.481) | 0.46 (0.446-0.476) | 0.553 (0.53-0.577) | |
| **2013** | 0.546 (0.523-0.569) | 0.464 (0.445-0.484) | 0.467 (0.452-0.482) | 0.563 (0.539-0.587) | |
| **2014** | 0.545 (0.522-0.57) | 0.462 (0.444-0.482) | 0.446 (0.432-0.461) | 0.556 (0.533-0.581) | |
| **2015** | 0.55 (0.526-0.575) | 0.455 (0.437-0.475) | 0.457 (0.442-0.472) | 0.55 (0.527-0.574) | |
| **2016** | 0.543 (0.519-0.568) | 0.463 (0.444-0.483) | 0.485 (0.47-0.501) | 0.571 (0.548-0.596) | |
| **2017** | 0.552 (0.527-0.578) | 0.483 (0.463-0.503) | 0.497 (0.482-0.513) | 0.58 (0.556-0.606) | |
| **2018** | 0.555 (0.531-0.581) | 0.494 (0.474-0.515) | 0.506 (0.49-0.522) | 0.593 (0.568-0.619) | |
| **2019** | 0.558 (0.533-0.584) | 0.499 (0.479-0.52) | 0.535 (0.519-0.551) | 0.607 (0.583-0.633) | |
| **2020** | 0.597 (0.571-0.624) | 0.536 (0.515-0.557) | 0.562 (0.546-0.579) | 0.621 (0.596-0.648) | |
| **85+ Age Group** | | | | |
| **1999** | 0.541 (0.505-0.579) | 0.433 (0.403-0.466) | 0.425 (0.401-0.451) | 0.482 (0.447-0.52) | |
| **2000** | 0.507 (0.474-0.543) | 0.418 (0.388-0.449) | 0.42 (0.396-0.446) | 0.493 (0.458-0.532) | |
| **2001** | 0.529 (0.496-0.565) | 0.436 (0.406-0.467) | 0.425 (0.401-0.45) | 0.496 (0.461-0.533) | |
| **2002** | 0.528 (0.495-0.564) | 0.458 (0.429-0.49) | 0.432 (0.408-0.457) | 0.502 (0.468-0.539) | |
| **2003** | 0.551 (0.517-0.587) | 0.439 (0.41-0.471) | 0.426 (0.402-0.451) | 0.488 (0.455-0.524) | |
| **2004** | 0.529 (0.496-0.563) | 0.467 (0.438-0.499) | 0.433 (0.409-0.458) | 0.499 (0.465-0.535) | |
| **2005** | 0.525 (0.493-0.558) | 0.447 (0.418-0.477) | 0.435 (0.412-0.46) | 0.521 (0.487-0.556) | |
| **2006** | 0.536 (0.505-0.57) | 0.471 (0.442-0.502) | 0.426 (0.404-0.45) | 0.544 (0.509-0.58) | |
| **2007** | 0.52 (0.489-0.552) | 0.437 (0.409-0.466) | 0.432 (0.41-0.456) | 0.528 (0.496-0.563) | |
| **2008** | 0.531 (0.5-0.563) | 0.448 (0.421-0.477) | 0.432 (0.409-0.455) | 0.548 (0.515-0.583) | |
| **2009** | 0.533 (0.502-0.566) | 0.472 (0.444-0.502) | 0.439 (0.417-0.463) | 0.545 (0.513-0.579) | |
| **2010** | 0.551 (0.52-0.584) | 0.445 (0.419-0.474) | 0.434 (0.412-0.457) | 0.557 (0.524-0.591) | |
| **2011** | 0.544 (0.514-0.577) | 0.474 (0.447-0.503) | 0.449 (0.426-0.472) | 0.569 (0.537-0.604) | |
| **2012** | 0.554 (0.524-0.587) | 0.467 (0.44-0.495) | 0.438 (0.417-0.462) | 0.562 (0.53-0.596) | |
| **2013** | 0.535 (0.505-0.566) | 0.453 (0.427-0.481) | 0.448 (0.426-0.471) | 0.56 (0.528-0.594) | |
| **2014** | 0.531 (0.501-0.563) | 0.453 (0.427-0.481) | 0.443 (0.421-0.466) | 0.564 (0.532-0.598) | |
| **2015** | 0.525 (0.496-0.555) | 0.459 (0.433-0.487) | 0.434 (0.413-0.456) | 0.571 (0.54-0.604) | |
| **2016** | 0.514 (0.485-0.545) | 0.454 (0.427-0.482) | 0.458 (0.436-0.481) | 0.568 (0.536-0.601) | |
| **2017** | 0.519 (0.489-0.551) | 0.483 (0.455-0.513) | 0.48 (0.457-0.503) | 0.56 (0.529-0.592) | |
| **2018** | 0.535 (0.504-0.568) | 0.488 (0.46-0.517) | 0.496 (0.473-0.52) | 0.596 (0.563-0.631) | |
| **2019** | 0.522 (0.491-0.554) | 0.498 (0.469-0.528) | 0.52 (0.496-0.545) | 0.603 (0.57-0.638) | |
| **2020** | 0.597 (0.562-0.635) | 0.531 (0.501-0.564) | 0.551 (0.526-0.577) | 0.634 (0.599-0.67) | |
|  |  |  |  |  | |

| **Supplementary Table 6: Lung Cancer-related Age-Adjusted Mortality Rates per 100,000, Stratified by Race in Adults in the United States 1999-2020** | | | | | |
| --- | --- | --- | --- | --- | --- |
| **Reporting Odds Ratio (95% CI)** | | | | | |
| **Year** | **American Indian or Alaska Native** | **Asian or Pacific Islander** | **Black or African American** | **White** | **Hispanic or Latino** |
| **15-24 Age Group** | | | | | |
| **1999** | Suppressed | Suppressed | Suppressed | Suppressed | Suppressed |
| **2000** | Suppressed | Suppressed | Suppressed | Suppressed | Suppressed |
| **2001** | Suppressed | Suppressed | Suppressed | Suppressed | Suppressed |
| **2002** | Suppressed | Suppressed | Suppressed | Suppressed | Suppressed |
| **2003** | Suppressed | Suppressed | Suppressed | Suppressed | Suppressed |
| **2004** | Suppressed | Suppressed | Suppressed | Suppressed | Suppressed |
| **2005** | Suppressed | Suppressed | Suppressed | Suppressed | Suppressed |
| **2006** | Suppressed | Suppressed | Suppressed | Suppressed | Suppressed |
| **2007** | Suppressed | Suppressed | Suppressed | Suppressed | Suppressed |
| **2008** | Suppressed | Suppressed | Suppressed | Suppressed | Suppressed |
| **2009** | Suppressed | Suppressed | Suppressed | Suppressed | Suppressed |
| **2010** | Suppressed | Suppressed | Suppressed | Suppressed | Suppressed |
| **2011** | Suppressed | Suppressed | Suppressed | Suppressed | Suppressed |
| **2012** | Suppressed | Suppressed | Suppressed | Suppressed | Suppressed |
| **2013** | Suppressed | Suppressed | Suppressed | Suppressed | Suppressed |
| **2014** | Suppressed | Suppressed | Suppressed | Suppressed | Suppressed |
| **2015** | Suppressed | Suppressed | Suppressed | Suppressed | Suppressed |
| **2016** | Suppressed | Suppressed | Suppressed | Suppressed | Suppressed |
| **2017** | Suppressed | Suppressed | Suppressed | Suppressed | Suppressed |
| **2018** | Suppressed | Suppressed | Suppressed | Suppressed | Suppressed |
| **2019** | Suppressed | Suppressed | Suppressed | Suppressed | Suppressed |
| **2020** | Suppressed | Suppressed | Suppressed | Suppressed | Suppressed |
| **25-34 Age Group** | | | | | |
| **1999** | Suppressed | Suppressed | Suppressed | Suppressed | Suppressed |
| **2000** | Suppressed | Suppressed | Suppressed | Suppressed | Suppressed |
| **2001** | Suppressed | Suppressed | Suppressed | Suppressed | Suppressed |
| **2002** | Suppressed | Suppressed | Suppressed | Suppressed | Suppressed |
| **2003** | Suppressed | Suppressed | Suppressed | Suppressed | Suppressed |
| **2004** | Suppressed | Suppressed | Suppressed | Suppressed | Suppressed |
| **2005** | Suppressed | Suppressed | Suppressed | Suppressed | Suppressed |
| **2006** | Suppressed | Suppressed | Suppressed | Suppressed | Suppressed |
| **2007** | Suppressed | Suppressed | Suppressed | Suppressed | Suppressed |
| **2008** | Suppressed | Suppressed | Suppressed | Suppressed | Suppressed |
| **2009** | Suppressed | Suppressed | Suppressed | Suppressed | Suppressed |
| **2010** | Suppressed | Suppressed | Suppressed | Suppressed | Suppressed |
| **2011** | Suppressed | Suppressed | Suppressed | Suppressed | Suppressed |
| **2012** | Suppressed | Suppressed | Suppressed | Suppressed | Suppressed |
| **2013** | Suppressed | Suppressed | Suppressed | Suppressed | Suppressed |
| **2014** | Suppressed | Suppressed | Suppressed | Suppressed | Suppressed |
| **2015** | Suppressed | Suppressed | Suppressed | Suppressed | Suppressed |
| **2016** | Suppressed | Suppressed | Suppressed | Suppressed | Suppressed |
| **2017** | Suppressed | Suppressed | Suppressed | Suppressed | Suppressed |
| **2018** | Suppressed | Suppressed | Suppressed | Suppressed | Suppressed |
| **2019** | Suppressed | Suppressed | Suppressed | Suppressed | Suppressed |
| **2020** | Suppressed | Suppressed | Suppressed | Suppressed | Suppressed |
| **35-44 Age Group** | | | | | |
| **1999** | Suppressed | Suppressed | 0.441 (0.356-0.546) | 0.429 (0.378-0.487) | 0.676 (0.421-1.084) |
| **2000** | Suppressed | Suppressed | 0.483 (0.39-0.598) | 0.427 (0.375-0.486) | 0.901 (0.574-1.414) |
| **2001** | Suppressed | Suppressed | 0.377 (0.294-0.483) | 0.454 (0.401-0.515) | 0.785 (0.5-1.234) |
| **2002** | Suppressed | Suppressed | 0.473 (0.376-0.594) | 0.388 (0.339-0.443) | 0.621 (0.37-1.043) |
| **2003** | Suppressed | Suppressed | 0.343 (0.26-0.451) | 0.436 (0.382-0.497) | 0.734 (0.452-1.193) |
| **2004** | Suppressed | Suppressed | 0.399 (0.31-0.515) | 0.43 (0.376-0.491) | 0.799 (0.504-1.267) |
| **2005** | Suppressed | Suppressed | 0.482 (0.375-0.62) | 0.421 (0.367-0.484) | 0.766 (0.502-1.168) |
| **2006** | Suppressed | Suppressed | 0.386 (0.291-0.512) | 0.427 (0.368-0.495) | 0.603 (0.369-0.985) |
| **2007** | Suppressed | Suppressed | 0.479 (0.361-0.636) | 0.426 (0.366-0.497) | 0.523 (0.307-0.889) |
| **2008** | Suppressed | Suppressed | 0.414 (0.303-0.565) | 0.361 (0.302-0.432) | 0.627 (0.377-1.041) |
| **2009** | Suppressed | Suppressed | 0.406 (0.289-0.572) | 0.439 (0.372-0.519) | 0.609 (0.381-0.974) |
| **2010** | Suppressed | Suppressed | 0.343 (0.225-0.522) | 0.403 (0.336-0.483) | 0.688 (0.427-1.109) |
| **2011** | Suppressed | Suppressed | 0.417 (0.289-0.602) | 0.455 (0.379-0.546) | 0.703 (0.437-1.132) |
| **2012** | Suppressed | Suppressed | 0.491 (0.35-0.689) | 0.411 (0.337-0.502) | 0.661 (0.401-1.088) |
| **2013** | Suppressed | Suppressed | 0.378 (0.256-0.558) | 0.495 (0.41-0.596) | 0.683 (0.433-1.078) |
| **2014** | Suppressed | Suppressed | 0.45 (0.311-0.651) | 0.486 (0.403-0.587) | 0.892 (0.568-1.399) |
| **2015** | Suppressed | Suppressed | 0.422 (0.289-0.617) | 0.576 (0.476-0.697) | 0.484 (0.289-0.809) |
| **2016** | Suppressed | Suppressed | 0.538 (0.366-0.79) | 0.567 (0.46-0.699) | 0.767 (0.485-1.212) |
| **2017** | Suppressed | Suppressed | 0.49 (0.333-0.722) | 0.538 (0.43-0.675) | 0.945 (0.608-1.47) |
| **2018** | Suppressed | Suppressed | 0.419 (0.282-0.623) | 0.611 (0.489-0.763) | 0.922 (0.589-1.443) |
| **2019** | Suppressed | Suppressed | 0.482 (0.335-0.695) | 0.732 (0.594-0.903) | 0.697 (0.428-1.134) |
| **2020** | Suppressed | Suppressed | 0.533 (0.37-0.769) | 0.688 (0.555-0.854) | 0.742 (0.474-1.159) |
| **45-54 Age Group** | | | | | |
| **1999** | 0.733 (0.435-1.235) | 0.51 (0.369-0.704) | 0.384 (0.345-0.427) | 0.371 (0.35-0.392) | 0.506 (0.391-0.653) |
| **2000** | 0.758 (0.455-1.261) | 0.391 (0.271-0.564) | 0.39 (0.351-0.434) | 0.369 (0.348-0.39) | 0.461 (0.356-0.597) |
| **2001** | 0.715 (0.415-1.233) | 0.477 (0.348-0.654) | 0.373 (0.334-0.416) | 0.401 (0.38-0.423) | 0.592 (0.47-0.745) |
| **2002** | 0.559 (0.311-1.004) | 0.49 (0.355-0.677) | 0.377 (0.339-0.419) | 0.383 (0.363-0.405) | 0.57 (0.452-0.718) |
| **2003** | 0.628 (0.355-1.113) | 0.417 (0.305-0.57) | 0.396 (0.358-0.439) | 0.37 (0.35-0.392) | 0.507 (0.401-0.641) |
| **2004** | 0.68 (0.389-1.187) | 0.415 (0.305-0.565) | 0.385 (0.347-0.427) | 0.375 (0.355-0.397) | 0.542 (0.431-0.682) |
| **2005** | 0.722 (0.441-1.181) | 0.492 (0.367-0.66) | 0.378 (0.34-0.419) | 0.373 (0.353-0.394) | 0.501 (0.397-0.631) |
| **2006** | 0.419 (0.226-0.776) | 0.514 (0.39-0.679) | 0.385 (0.348-0.426) | 0.381 (0.36-0.402) | 0.508 (0.402-0.642) |
| **2007** | 0.502 (0.281-0.894) | 0.485 (0.366-0.642) | 0.377 (0.34-0.419) | 0.371 (0.351-0.393) | 0.584 (0.47-0.725) |
| **2008** | 0.583 (0.342-0.994) | 0.462 (0.347-0.615) | 0.402 (0.362-0.445) | 0.398 (0.377-0.42) | 0.534 (0.429-0.664) |
| **2009** | 0.596 (0.349-1.016) | 0.58 (0.439-0.766) | 0.4 (0.361-0.444) | 0.396 (0.376-0.418) | 0.548 (0.443-0.677) |
| **2010** | 0.69 (0.423-1.126) | 0.496 (0.371-0.664) | 0.378 (0.34-0.42) | 0.39 (0.369-0.413) | 0.528 (0.427-0.654) |
| **2011** | 0.766 (0.466-1.258) | 0.504 (0.375-0.677) | 0.394 (0.354-0.44) | 0.394 (0.372-0.417) | 0.467 (0.37-0.589) |
| **2012** | 0.686 (0.438-1.075) | 0.429 (0.319-0.575) | 0.404 (0.363-0.45) | 0.4 (0.378-0.424) | 0.528 (0.424-0.656) |
| **2013** | 0.343 (0.195-0.604) | 0.369 (0.27-0.506) | 0.394 (0.351-0.442) | 0.407 (0.385-0.432) | 0.501 (0.4-0.627) |
| **2014** | 0.563 (0.33-0.961) | 0.416 (0.311-0.557) | 0.421 (0.374-0.473) | 0.395 (0.372-0.42) | 0.551 (0.443-0.687) |
| **2015** | 0.42 (0.242-0.731) | 0.436 (0.326-0.584) | 0.454 (0.402-0.512) | 0.404 (0.38-0.43) | 0.54 (0.431-0.677) |
| **2016** | 0.493 (0.286-0.849) | 0.486 (0.365-0.647) | 0.403 (0.353-0.462) | 0.431 (0.404-0.46) | 0.632 (0.509-0.783) |
| **2017** | 0.502 (0.3-0.84) | 0.673 (0.52-0.87) | 0.434 (0.375-0.502) | 0.458 (0.429-0.49) | 0.542 (0.425-0.693) |
| **2018** | 0.564 (0.334-0.951) | 0.542 (0.407-0.724) | 0.446 (0.384-0.518) | 0.478 (0.447-0.512) | 0.547 (0.431-0.695) |
| **2019** | 0.432 (0.252-0.742) | 0.526 (0.395-0.701) | 0.428 (0.363-0.503) | 0.496 (0.462-0.533) | 0.437 (0.335-0.57) |
| **2020** | 0.43 (0.242-0.762) | 0.543 (0.409-0.722) | 0.541 (0.465-0.629) | 0.477 (0.443-0.514) | 0.668 (0.528-0.845) |
| **55-64 Age Group** | | | | | |
| **1999** | 0.358 (0.235-0.544) | 0.449 (0.354-0.569) | 0.392 (0.364-0.422) | 0.393 (0.381-0.405) | 0.482 (0.412-0.564) |
| **2000** | 0.389 (0.253-0.597) | 0.481 (0.386-0.6) | 0.402 (0.374-0.433) | 0.388 (0.376-0.4) | 0.518 (0.442-0.608) |
| **2001** | 0.429 (0.285-0.645) | 0.491 (0.396-0.608) | 0.436 (0.406-0.468) | 0.397 (0.385-0.409) | 0.526 (0.453-0.611) |
| **2002** | 0.43 (0.294-0.628) | 0.495 (0.403-0.609) | 0.413 (0.385-0.444) | 0.389 (0.377-0.401) | 0.475 (0.408-0.552) |
| **2003** | 0.431 (0.288-0.645) | 0.463 (0.371-0.576) | 0.392 (0.364-0.421) | 0.392 (0.38-0.404) | 0.424 (0.361-0.498) |
| **2004** | 0.448 (0.312-0.645) | 0.411 (0.329-0.514) | 0.429 (0.4-0.46) | 0.41 (0.397-0.423) | 0.445 (0.38-0.521) |
| **2005** | 0.305 (0.201-0.463) | 0.472 (0.387-0.575) | 0.398 (0.371-0.427) | 0.414 (0.401-0.427) | 0.468 (0.403-0.543) |
| **2006** | 0.431 (0.3-0.619) | 0.494 (0.407-0.599) | 0.429 (0.401-0.46) | 0.413 (0.401-0.426) | 0.452 (0.386-0.528) |
| **2007** | 0.487 (0.348-0.682) | 0.447 (0.366-0.547) | 0.425 (0.397-0.456) | 0.414 (0.402-0.427) | 0.471 (0.405-0.546) |
| **2008** | 0.462 (0.322-0.661) | 0.453 (0.373-0.551) | 0.42 (0.392-0.451) | 0.42 (0.407-0.433) | 0.46 (0.397-0.533) |
| **2009** | 0.438 (0.312-0.616) | 0.536 (0.449-0.64) | 0.426 (0.398-0.456) | 0.423 (0.41-0.436) | 0.43 (0.369-0.501) |
| **2010** | 0.439 (0.311-0.62) | 0.487 (0.408-0.581) | 0.425 (0.397-0.454) | 0.429 (0.416-0.442) | 0.493 (0.428-0.567) |
| **2011** | 0.409 (0.284-0.589) | 0.474 (0.397-0.566) | 0.422 (0.395-0.452) | 0.43 (0.417-0.443) | 0.52 (0.455-0.596) |
| **2012** | 0.433 (0.31-0.605) | 0.473 (0.394-0.567) | 0.441 (0.413-0.471) | 0.428 (0.415-0.441) | 0.481 (0.42-0.552) |
| **2013** | 0.396 (0.274-0.572) | 0.462 (0.386-0.553) | 0.453 (0.425-0.483) | 0.438 (0.425-0.452) | 0.487 (0.426-0.558) |
| **2014** | 0.425 (0.298-0.606) | 0.527 (0.447-0.622) | 0.431 (0.404-0.46) | 0.429 (0.416-0.442) | 0.493 (0.43-0.564) |
| **2015** | 0.402 (0.283-0.57) | 0.45 (0.378-0.535) | 0.423 (0.396-0.452) | 0.436 (0.423-0.449) | 0.535 (0.473-0.606) |
| **2016** | 0.57 (0.428-0.761) | 0.494 (0.419-0.583) | 0.458 (0.429-0.488) | 0.443 (0.429-0.456) | 0.528 (0.465-0.599) |
| **2017** | 0.428 (0.313-0.586) | 0.463 (0.39-0.548) | 0.467 (0.438-0.499) | 0.46 (0.447-0.474) | 0.552 (0.486-0.627) |
| **2018** | 0.392 (0.28-0.549) | 0.475 (0.4-0.563) | 0.462 (0.432-0.494) | 0.466 (0.452-0.48) | 0.534 (0.47-0.606) |
| **2019** | 0.51 (0.38-0.684) | 0.528 (0.45-0.62) | 0.473 (0.442-0.506) | 0.478 (0.464-0.493) | 0.516 (0.451-0.59) |
| **2020** | 0.682 (0.517-0.901) | 0.553 (0.475-0.644) | 0.499 (0.466-0.533) | 0.496 (0.481-0.511) | 0.602 (0.533-0.679) |
| **65-74 Age Group** | | | | | |
| **1999** | 0.295 (0.2-0.435) | 0.516 (0.442-0.602) | 0.43 (0.405-0.456) | 0.435 (0.426-0.444) | 0.475 (0.422-0.534) |
| **2000** | 0.303 (0.204-0.45) | 0.484 (0.413-0.568) | 0.426 (0.402-0.452) | 0.423 (0.414-0.432) | 0.487 (0.434-0.547) |
| **2001** | 0.367 (0.258-0.523) | 0.428 (0.362-0.505) | 0.447 (0.422-0.474) | 0.438 (0.429-0.447) | 0.519 (0.465-0.581) |
| **2002** | 0.39 (0.28-0.545) | 0.513 (0.437-0.602) | 0.451 (0.425-0.479) | 0.445 (0.435-0.454) | 0.463 (0.413-0.519) |
| **2003** | 0.419 (0.303-0.581) | 0.513 (0.44-0.598) | 0.44 (0.414-0.467) | 0.443 (0.433-0.452) | 0.484 (0.432-0.542) |
| **2004** | 0.44 (0.332-0.583) | 0.499 (0.431-0.578) | 0.454 (0.428-0.482) | 0.451 (0.441-0.461) | 0.495 (0.442-0.554) |
| **2005** | 0.404 (0.295-0.553) | 0.555 (0.48-0.642) | 0.46 (0.433-0.488) | 0.452 (0.442-0.462) | 0.451 (0.403-0.506) |
| **2006** | 0.416 (0.305-0.568) | 0.554 (0.48-0.64) | 0.455 (0.429-0.483) | 0.467 (0.457-0.478) | 0.463 (0.414-0.518) |
| **2007** | 0.401 (0.297-0.543) | 0.516 (0.446-0.598) | 0.482 (0.454-0.511) | 0.472 (0.462-0.482) | 0.47 (0.421-0.525) |
| **2008** | 0.52 (0.4-0.678) | 0.516 (0.447-0.596) | 0.468 (0.441-0.497) | 0.473 (0.463-0.484) | 0.504 (0.453-0.562) |
| **2009** | 0.427 (0.317-0.576) | 0.51 (0.44-0.591) | 0.477 (0.449-0.506) | 0.467 (0.457-0.478) | 0.519 (0.466-0.578) |
| **2010** | 0.412 (0.312-0.545) | 0.501 (0.434-0.579) | 0.483 (0.455-0.512) | 0.47 (0.46-0.481) | 0.556 (0.5-0.617) |
| **2011** | 0.417 (0.31-0.559) | 0.519 (0.452-0.595) | 0.472 (0.445-0.501) | 0.472 (0.462-0.483) | 0.534 (0.481-0.593) |
| **2012** | 0.386 (0.292-0.51) | 0.469 (0.406-0.54) | 0.455 (0.429-0.483) | 0.484 (0.473-0.494) | 0.514 (0.463-0.571) |
| **2013** | 0.485 (0.372-0.632) | 0.49 (0.427-0.563) | 0.468 (0.442-0.496) | 0.481 (0.471-0.492) | 0.515 (0.465-0.571) |
| **2014** | 0.483 (0.379-0.617) | 0.488 (0.425-0.559) | 0.462 (0.436-0.49) | 0.476 (0.465-0.486) | 0.5 (0.452-0.554) |
| **2015** | 0.479 (0.373-0.616) | 0.497 (0.439-0.564) | 0.468 (0.442-0.496) | 0.476 (0.466-0.487) | 0.525 (0.476-0.579) |
| **2016** | 0.439 (0.339-0.569) | 0.492 (0.433-0.559) | 0.476 (0.45-0.504) | 0.491 (0.481-0.502) | 0.521 (0.471-0.577) |
| **2017** | 0.506 (0.395-0.649) | 0.513 (0.454-0.581) | 0.502 (0.475-0.53) | 0.502 (0.491-0.513) | 0.54 (0.49-0.595) |
| **2018** | 0.613 (0.494-0.762) | 0.505 (0.445-0.573) | 0.481 (0.455-0.509) | 0.513 (0.502-0.524) | 0.514 (0.466-0.568) |
| **2019** | 0.492 (0.383-0.633) | 0.522 (0.462-0.589) | 0.506 (0.479-0.535) | 0.517 (0.506-0.529) | 0.517 (0.47-0.568) |
| **2020** | 0.554 (0.437-0.702) | 0.544 (0.485-0.61) | 0.546 (0.518-0.576) | 0.555 (0.543-0.566) | 0.611 (0.56-0.667) |
| **75-84 Age Group** | | | | | |
| **1999** | 0.368 (0.237-0.571) | 0.56 (0.477-0.657) | 0.448 (0.419-0.479) | 0.446 (0.437-0.455) | 0.481 (0.423-0.547) |
| **2000** | 0.404 (0.265-0.616) | 0.511 (0.436-0.598) | 0.444 (0.415-0.475) | 0.455 (0.446-0.464) | 0.48 (0.425-0.542) |
| **2001** | 0.309 (0.202-0.472) | 0.555 (0.479-0.643) | 0.436 (0.408-0.467) | 0.445 (0.436-0.454) | 0.52 (0.463-0.585) |
| **2002** | 0.394 (0.266-0.584) | 0.535 (0.46-0.622) | 0.447 (0.419-0.478) | 0.456 (0.447-0.465) | 0.485 (0.432-0.545) |
| **2003** | 0.456 (0.315-0.661) | 0.529 (0.46-0.608) | 0.461 (0.432-0.492) | 0.456 (0.447-0.466) | 0.508 (0.455-0.568) |
| **2004** | 0.416 (0.291-0.595) | 0.551 (0.48-0.632) | 0.457 (0.429-0.488) | 0.456 (0.447-0.465) | 0.516 (0.463-0.575) |
| **2005** | 0.443 (0.309-0.634) | 0.53 (0.461-0.609) | 0.462 (0.433-0.493) | 0.465 (0.456-0.474) | 0.489 (0.44-0.544) |
| **2006** | 0.43 (0.298-0.62) | 0.557 (0.487-0.637) | 0.473 (0.442-0.505) | 0.471 (0.462-0.48) | 0.486 (0.436-0.543) |
| **2007** | 0.458 (0.329-0.636) | 0.518 (0.453-0.591) | 0.464 (0.434-0.496) | 0.477 (0.467-0.487) | 0.472 (0.423-0.526) |
| **2008** | 0.466 (0.338-0.641) | 0.567 (0.5-0.644) | 0.486 (0.455-0.518) | 0.472 (0.463-0.482) | 0.506 (0.457-0.562) |
| **2009** | 0.535 (0.388-0.738) | 0.543 (0.478-0.615) | 0.479 (0.448-0.512) | 0.487 (0.477-0.497) | 0.536 (0.484-0.593) |
| **2010** | 0.53 (0.39-0.721) | 0.576 (0.51-0.65) | 0.489 (0.458-0.523) | 0.493 (0.483-0.504) | 0.553 (0.501-0.61) |
| **2011** | 0.497 (0.368-0.67) | 0.56 (0.496-0.634) | 0.485 (0.454-0.519) | 0.497 (0.487-0.508) | 0.539 (0.488-0.596) |
| **2012** | 0.524 (0.387-0.708) | 0.549 (0.485-0.62) | 0.498 (0.466-0.531) | 0.493 (0.483-0.504) | 0.531 (0.481-0.586) |
| **2013** | 0.549 (0.41-0.735) | 0.564 (0.501-0.634) | 0.484 (0.454-0.517) | 0.499 (0.489-0.51) | 0.554 (0.503-0.61) |
| **2014** | 0.481 (0.358-0.646) | 0.51 (0.451-0.576) | 0.489 (0.458-0.522) | 0.49 (0.48-0.501) | 0.525 (0.476-0.578) |
| **2015** | 0.508 (0.379-0.68) | 0.516 (0.457-0.582) | 0.468 (0.437-0.501) | 0.496 (0.485-0.506) | 0.53 (0.482-0.584) |
| **2016** | 0.43 (0.317-0.584) | 0.503 (0.446-0.567) | 0.512 (0.479-0.546) | 0.509 (0.498-0.52) | 0.542 (0.493-0.595) |
| **2017** | 0.575 (0.439-0.754) | 0.534 (0.475-0.601) | 0.515 (0.483-0.55) | 0.52 (0.509-0.531) | 0.538 (0.489-0.592) |
| **2018** | 0.483 (0.364-0.64) | 0.544 (0.484-0.612) | 0.517 (0.484-0.552) | 0.533 (0.522-0.545) | 0.511 (0.463-0.563) |
| **2019** | 0.611 (0.47-0.795) | 0.516 (0.459-0.58) | 0.519 (0.487-0.554) | 0.551 (0.539-0.562) | 0.53 (0.483-0.583) |
| **2020** | 0.623 (0.484-0.801) | 0.557 (0.499-0.622) | 0.565 (0.531-0.602) | 0.576 (0.564-0.588) | 0.609 (0.557-0.666) |
| **85+ Age Group** | | | | | |
| **1999** | Suppressed | 0.6 (0.459-0.785) | 0.475 (0.419-0.538) | 0.461 (0.444-0.478) | 0.471 (0.383-0.58) |
| **2000** | Suppressed | 0.59 (0.454-0.766) | 0.439 (0.386-0.5) | 0.451 (0.435-0.467) | 0.513 (0.418-0.629) |
| **2001** | Suppressed | 0.547 (0.432-0.693) | 0.459 (0.404-0.521) | 0.463 (0.447-0.479) | 0.519 (0.424-0.634) |
| **2002** | Suppressed | 0.596 (0.472-0.752) | 0.485 (0.429-0.549) | 0.471 (0.455-0.487) | 0.489 (0.399-0.598) |
| **2003** | Suppressed | 0.537 (0.423-0.681) | 0.467 (0.413-0.529) | 0.469 (0.453-0.485) | 0.501 (0.413-0.609) |
| **2004** | Suppressed | 0.567 (0.446-0.721) | 0.493 (0.437-0.556) | 0.473 (0.458-0.49) | 0.504 (0.42-0.606) |
| **2005** | Suppressed | 0.593 (0.482-0.729) | 0.485 (0.432-0.544) | 0.473 (0.458-0.489) | 0.487 (0.405-0.585) |
| **2006** | Suppressed | 0.63 (0.517-0.768) | 0.512 (0.456-0.575) | 0.481 (0.465-0.497) | 0.504 (0.42-0.605) |
| **2007** | Suppressed | 0.597 (0.492-0.724) | 0.479 (0.427-0.538) | 0.469 (0.454-0.485) | 0.486 (0.408-0.577) |
| **2008** | Suppressed | 0.628 (0.52-0.757) | 0.491 (0.439-0.549) | 0.477 (0.462-0.493) | 0.55 (0.466-0.648) |
| **2009** | Suppressed | 0.614 (0.517-0.729) | 0.526 (0.47-0.589) | 0.485 (0.47-0.5) | 0.497 (0.419-0.59) |
| **2010** | Suppressed | 0.535 (0.442-0.647) | 0.47 (0.421-0.525) | 0.489 (0.474-0.504) | 0.539 (0.46-0.631) |
| **2011** | Suppressed | 0.536 (0.449-0.641) | 0.485 (0.434-0.542) | 0.499 (0.484-0.515) | 0.579 (0.501-0.668) |
| **2012** | Suppressed | 0.544 (0.46-0.645) | 0.507 (0.455-0.566) | 0.495 (0.48-0.51) | 0.527 (0.453-0.612) |
| **2013** | Suppressed | 0.514 (0.436-0.606) | 0.49 (0.44-0.546) | 0.491 (0.476-0.506) | 0.507 (0.439-0.585) |
| **2014** | Suppressed | 0.545 (0.465-0.638) | 0.485 (0.435-0.54) | 0.488 (0.473-0.503) | 0.53 (0.462-0.608) |
| **2015** | Suppressed | 0.51 (0.435-0.598) | 0.475 (0.427-0.529) | 0.488 (0.473-0.503) | 0.552 (0.484-0.63) |
| **2016** | Suppressed | 0.51 (0.437-0.597) | 0.477 (0.429-0.53) | 0.492 (0.477-0.507) | 0.54 (0.473-0.618) |
| **2017** | Suppressed | 0.519 (0.447-0.602) | 0.451 (0.403-0.505) | 0.51 (0.495-0.526) | 0.528 (0.463-0.603) |
| **2018** | Suppressed | 0.496 (0.427-0.576) | 0.481 (0.432-0.536) | 0.525 (0.51-0.541) | 0.609 (0.538-0.689) |
| **2019** | Suppressed | 0.569 (0.496-0.654) | 0.512 (0.462-0.568) | 0.532 (0.517-0.548) | 0.56 (0.495-0.634) |
| **2020** | Suppressed | 0.588 (0.513-0.676) | 0.554 (0.5-0.613) | 0.573 (0.557-0.591) | 0.631 (0.558-0.712) |

| **Supplementary Table 7: Total Deaths and Returning Odds Ratio of CVD Burden in Lung Cancer, Stratified by Place of Death in Individuals aged 15-85+ in United States from 1999-2020** | | | | | | | |
| --- | --- | --- | --- | --- | --- | --- | --- |
| **Deaths and Reporting Odds Ratio (95% CI)** | | | | | | | |
| **Cohort** | **Lung Cancer and CVD Deaths (A)** | **Total Lung Cancer Deaths (B)** | **Total CVD Deaths (C)** | **All-Cause Deaths (D)** | **A/B** | **C/D** | **ROR (95% CI)** |
| **15-24 Age Group** | | | | | | | |
| Medical Facility | 73 | 341 | 52016 | 176907 | 0.214 | 0.294 | 0.728 |
| Decedent's home | 22 | 179 | 13244 | 138939 | 0.123 | 0.095 | 1.289 |
| Hospice facility | Suppressed | Suppressed | Suppressed | Suppressed | Suppressed | Suppressed | Suppressed |
| Nursing home/long term care | Suppressed | Suppressed | Suppressed | Suppressed | Suppressed | Suppressed | Suppressed |
| Other/Unknown | Suppressed | Suppressed | Suppressed | Suppressed | Suppressed | Suppressed | Suppressed |
| **25-34 Age Group** | | | | | | | |
| Medical Facility | 410 | 1841 | 130131 | 456185 | 0.223 | 0.285 | 0.781 |
| Decedent's home | 97 | 1010 | 47473 | 289152 | 0.096 | 0.164 | 0.585 |
| Hospice facility | 11 | 181 | 1782 | 10634 | 0.061 | 0.168 | 0.363 |
| Nursing home/long term care | 15 | 95 | 3111 | 12316 | 0.158 | 0.253 | 0.625 |
| Other/Unknown | 23 | 160 | 15172 | 274756 | 0.144 | 0.055 | 2.603 |
| **35-44 Age Group** | | | | | | | |
| Medical Facility | 3680 | 17328 | 371184 | 855610 | 0.212 | 0.434 | 0.49 |
| Decedent's home | 1303 | 13610 | 159644 | 551767 | 0.096 | 0.289 | 0.331 |
| Hospice facility | 200 | 1868 | 5960 | 34162 | 0.107 | 0.174 | 0.614 |
| Nursing home/long term care | 242 | 2060 | 13212 | 47770 | 0.117 | 0.277 | 0.425 |
| Other/Unknown | 232 | 2242 | 41314 | 294040 | 0.103 | 0.141 | 0.736 |
| **45-54 Age Group** | | | | | | | |
| Medical Facility | 23658 | 98183 | 992753 | 1899401 | 0.241 | 0.523 | 0.461 |
| Decedent's home | 11406 | 92821 | 508190 | 1289012 | 0.123 | 0.394 | 0.312 |
| Hospice facility | 1877 | 15711 | 24030 | 121680 | 0.119 | 0.197 | 0.605 |
| Nursing home/long term care | 2890 | 17381 | 60459 | 177409 | 0.166 | 0.341 | 0.488 |
| Other/Unknown | 1170 | 13312 | 103275 | 382180 | 0.088 | 0.27 | 0.325 |
| **55-64 Age Group** | | | | | | | |
| Medical Facility | 75760 | 267017 | 1912702 | 3331399 | 0.284 | 0.574 | 0.494 |
| Decedent's home | 45912 | 285062 | 1054268 | 2333470 | 0.161 | 0.452 | 0.356 |
| Hospice facility | 7143 | 51019 | 72915 | 298875 | 0.14 | 0.244 | 0.574 |
| Nursing home/long term care | 12978 | 60539 | 213891 | 497871 | 0.214 | 0.43 | 0.499 |
| Other/Unknown | 5613 | 35165 | 160180 | 423424 | 0.16 | 0.378 | 0.422 |
| **65-74 Age Group** | | | | | | | |
| Medical Facility | 133582 | 404102 | 2954128 | 4757594 | 0.331 | 0.621 | 0.532 |
| Decedent's home | 97829 | 474767 | 1509220 | 3140309 | 0.206 | 0.481 | 0.429 |
| Hospice facility | 14220 | 79922 | 156929 | 476610 | 0.178 | 0.329 | 0.54 |
| Nursing home/long term care | 33617 | 126732 | 627978 | 1216589 | 0.265 | 0.516 | 0.514 |
| Other/Unknown | 10833 | 56545 | 188506 | 443186 | 0.192 | 0.425 | 0.45 |
| **75-84 Age Group** | | | | | | | |
| Medical Facility | 120860 | 323753 | 4132672 | 6182492 | 0.373 | 0.668 | 0.558 |
| Decedent's home | 109214 | 441761 | 2128451 | 3914642 | 0.247 | 0.544 | 0.455 |
| Hospice facility | 15179 | 72814 | 295366 | 668453 | 0.208 | 0.442 | 0.472 |
| Nursing home/long term care | 54310 | 178863 | 1934536 | 3304530 | 0.304 | 0.585 | 0.519 |
| Other/Unknown | 13891 | 60923 | 320613 | 653105 | 0.228 | 0.491 | 0.464 |
| **85+ Age Group** | | | | | | | |
| Medical Facility | 34998 | 85829 | 3542006 | 5072133 | 0.408 | 0.698 | 0.584 |
| Decedent's home | 45964 | 156805 | 2451142 | 3753780 | 0.293 | 0.653 | 0.449 |
| Hospice facility | 7073 | 29976 | 432461 | 768095 | 0.236 | 0.563 | 0.419 |
| Nursing home/long term care | 35354 | 104172 | 4190898 | 6480050 | 0.339 | 0.647 | 0.525 |
| Other/Unknown | 7442 | 27404 | 546167 | 904942 | 0.272 | 0.604 | 0.45 |
